# Supplementary material for: Gene Network Analysis Reveals Candidate Genes Related with the Hair Follicle Development in Sheep
Source: Research Square preprint supplement (doi:10.21203/rs.3.rs-1335321/v1), 2022-02-18
Supplement: Supplementary file 1 [file fb05c735ca505a3ce6d5ef63.xlsx]

## Sheet: cluster 1
Category	Term		Count	PValue	Genes	Fold Enrichment	Benjamini	FDR
GOTERM_BP_DIRECT	GO:0032800	receptor biosynthetic process	2	0.042451	ENSOARG00000012439, ENSOARG00000008333	46.1429	1	1
GOTERM_BP_DIRECT	GO:0006935	chemotaxis	3	0.053138	ENSOARG00000014203, ENSOARG00000019477, ENSOARG00000017562	7.98626	1	1
GOTERM_BP_DIRECT	GO:0042773	ATP synthesis coupled electron transport	2	0.0561996	ENSOARG00000000027, ENSOARG00000000032	34.6071	1	1
GOTERM_BP_DIRECT	GO:0007626	locomotory behavior	4	0.0593732	ENSOARG00000017626, ENSOARG00000002285, ENSOARG00000000229, ENSOARG00000011817	4.46544	1	1
GOTERM_BP_DIRECT	GO:0071371	cellular response to gonadotropin stimulus	2	0.069752	ENSOARG00000014229, ENSOARG00000020812	27.6857	1	1
GOTERM_BP_DIRECT	GO:0006955	immune response	6	0.0755284	ENSOARG00000014082, ENSOARG00000018736, ENSOARG00000005972, ENSOARG00000020877, ENSOARG00000014496, ENSOARG00000016098	2.64513	1	1
GOTERM_BP_DIRECT	GO:0045766	positive regulation of angiogenesis	4	0.0792341	ENSOARG00000011444, ENSOARG00000020877, ENSOARG00000018710, ENSOARG00000006065	3.9551	1	1
GOTERM_BP_DIRECT	GO:0050665	hydrogen peroxide biosynthetic process	2	0.0831111	ENSOARG00000021057, ENSOARG00000003346	23.0714	1	1
GOTERM_BP_DIRECT	GO:0043508	negative regulation of JUN kinase activity	2	0.0962796	ENSOARG00000002359, ENSOARG00000012968	19.7755	1	1
GOTERM_BP_DIRECT	GO:0009950	dorsal/ventral axis specification	2	0.0962796	ENSOARG00000002359, ENSOARG00000011249	19.7755	1	1

## Sheet: cluster 2
Category	Term		Count	%	PValue	Genes	List Total	Pop Hits	Pop Total	Fold Enrichment	Bonferroni	Benjamini	FDR
GOTERM_BP_DIRECT	GO:0060271	cilium morphogenesis	8	0.834202	0.000128937	CFAP221, IFT43, IQUB, NPHP3, ASAP1, IFT57, TROVE2, PTPDC1	593	22	10659	6.53626	0.21294	0.239435	0.239435
GOTERM_BP_DIRECT	GO:0009952	anterior/posterior pattern specification	13	1.35558	0.000320872	EMX2, KMT2A, PCSK5, HOXA10, HOXA9, SMO, SCMH1, HOXC5, HOXC4, HOXD3, HOXA6, CDON, HOXB5	593	68	10659	3.43634	0.448964	0.29793	0.29793
GOTERM_BP_DIRECT	GO:0006355	regulation of transcription, DNA-templated	33	3.44108	0.000832146	OGG1, IGSF1, LOC101123551, SCML2, HOXA9, ZNF829, SCMH1, ZNF41, ALX3, LOC101114390, LOC105605829, MYBL1, ZNF300, ZNF420, DRGX, EMX2, TLE2, BRF2, ZNF184, EBF2, TLE6, MEIS1, ZNF93, LOC101122971, ASXL3, LOC101122457, TFEC, ZNF514, ZNF711, HOXD3, LOC105601916, ZNF114, HOXB5	593	319	10659	1.85945	0.786888	0.515098	0.515098
GOTERM_BP_DIRECT	GO:0007224	smoothened signaling pathway	10	1.04275	0.00176897	SMO, ARL13B, IQUB, IFT27, ROR2, IFT57, TROVE2, PTPDC1, CDON, DISP1	593	51	10659	3.52445	0.962667	0.821244	0.821244
GOTERM_BP_DIRECT	GO:0006486	protein glycosylation	9	0.938478	0.00836767	GALNT7, GALNT5, GALNT16, FUT11, GCNT3, UGGT2, ST3GAL1, ST3GAL2, ST3GAL3	593	53	10659	3.05231	1	1	1
GOTERM_BP_DIRECT	GO:0007389	pattern specification process	5	0.521376	0.0100356	ZEB1, SYNGAP1, ZIC1, ALX3, DCHS1	593	16	10659	5.6171	1	1	1
GOTERM_BP_DIRECT	GO:0007368	determination of left/right symmetry	7	0.729927	0.010163	DYNC2LI1, DNAI2, DAAM2, RPGRIP1L, PITX2, PCSK5, DISP1	593	34	10659	3.70067	1	1	1
GOTERM_BP_DIRECT	GO:0001501	skeletal system development	7	0.729927	0.010163	HOXA10, GDF11, RASSF2, GJA5, COL5A2, SOX4, FBN1	593	34	10659	3.70067	1	1	1
GOTERM_BP_DIRECT	GO:0048485	sympathetic nervous system development	4	0.417101	0.015252	HAND2, NF1, PLXNA4, SOX4	593	10	10659	7.18988	1	1	1
GOTERM_BP_DIRECT	GO:0016525	negative regulation of angiogenesis	7	0.729927	0.0219269	ADGRB2, ADGRB3, NF1, PTPRM, TCF4, VASH1, THBS4	593	40	10659	3.14557	1	1	1
GOTERM_BP_DIRECT	GO:0045666	positive regulation of neuron differentiation	7	0.729927	0.0219269	MEF2C, BRINP2, ZEB1, TCF4, HOXD3, TLE6, CDON	593	40	10659	3.14557	1	1	1
GOTERM_BP_DIRECT	GO:0021915	neural tube development	5	0.521376	0.0224112	FAM212A, INTU, NF1, PLOD3, DCHS1	593	20	10659	4.49368	1	1	1
GOTERM_BP_DIRECT	GO:0060976	coronary vasculature development	5	0.521376	0.0224112	PTK7, GPC3, PRICKLE1, PCSK5, LTBP1	593	20	10659	4.49368	1	1	1
GOTERM_BP_DIRECT	GO:0007166	cell surface receptor signaling pathway	10	1.04275	0.0225631	ADGRD1, KHDRBS1, LOC105605924, VIPR2, ADGRV1, ADGRG7, ADGRB2, ADGRB3, GLP2R, CBLB	593	75	10659	2.39663	1	1	1
GOTERM_BP_DIRECT	GO:0007156	homophilic cell adhesion via plasma membrane adhesion molecules	10	1.04275	0.0243835	ROBO2, CADM3, CDHR1, PTPRM, DCHS1, PCDH12, LOC105615271, PCDH17, CDH8, LOC101102062	593	76	10659	2.36509	1	1	1
GOTERM_BP_DIRECT	GO:0035116	embryonic hindlimb morphogenesis	5	0.521376	0.0265012	OSR1, ALX3, GPC3, RPGRIP1L, PITX2	593	21	10659	4.27969	1	1	1
GOTERM_BP_DIRECT	GO:0045494	photoreceptor cell maintenance	5	0.521376	0.0359404	ADGRV1, CDHR1, MAK, NPHP3, TULP1	593	23	10659	3.90754	1	1	1
GOTERM_BP_DIRECT	GO:0007165	signal transduction	17	1.77268	0.0388744	TENM3, IGSF1, ARHGAP19, ANK2, ANK3, IL17RD, AKAP12, ARHGAP22, SMOC2, ARHGAP20, PDE10A, DLC1, TRAF5, PDE5A, SRGAP3, PKN1, SRGAP1	593	178	10659	1.71669	1	1	1
GOTERM_BP_DIRECT	GO:0021542	dentate gyrus development	4	0.417101	0.0392246	ATAT1, EMX2, SMO, PROX1	593	14	10659	5.13563	1	1	1
GOTERM_BP_DIRECT	GO:0016358	dendrite development	5	0.521376	0.0412978	GRIN3A, SYNGAP1, MCF2, MAP1B, TULP1	593	24	10659	3.74473	1	1	1
GOTERM_BP_DIRECT	GO:0007269	neurotransmitter secretion	4	0.417101	0.0470641	SNAP25, STXBP1, NRXN2, LIN7A	593	15	10659	4.79325	1	1	1
GOTERM_BP_DIRECT	GO:0043392	negative regulation of DNA binding	4	0.417101	0.0470641	ZNF462, SMO, HAND2, MDFI	593	15	10659	4.79325	1	1	1
GOTERM_BP_DIRECT	GO:0090102	cochlea development	4	0.417101	0.0470641	GABRB3, IFT27, DCHS1, RPGRIP1L	593	15	10659	4.79325	1	1	1
GOTERM_BP_DIRECT	GO:0002062	chondrocyte differentiation	5	0.521376	0.047082	MEF2C, WNT2B, FGF9, OSR1, CREB3L2	593	25	10659	3.59494	1	1	1
GOTERM_BP_DIRECT	GO:0071230	cellular response to amino acid stimulus	6	0.625652	0.0471579	ZEB1, COL16A1, MMP2, DNMT3A, COL5A2, PDGFC	593	36	10659	2.99578	1	1	1
GOTERM_BP_DIRECT	GO:0051965	positive regulation of synapse assembly	7	0.729927	0.0527388	NLGN3, BHLHB9, ADGRB2, ADGRB3, SLITRK1, LRRTM1, TPBG	593	49	10659	2.56781	1	1	1
GOTERM_BP_DIRECT	GO:0035115	embryonic forelimb morphogenesis	5	0.521376	0.0532915	HOXA9, OSR1, ALX3, RPGRIP1L, RECK	593	26	10659	3.45667	1	1	1
GOTERM_BP_DIRECT	GO:0003139	secondary heart field specification	3	0.312826	0.0536866	MEF2C, SMARCD3, RBPJ	593	7	10659	7.70344	1	1	1
GOTERM_BP_DIRECT	GO:0060412	ventricular septum morphogenesis	4	0.417101	0.0556091	GJA5, PROX1, PITX2, SOX4	593	16	10659	4.49368	1	1	1
GOTERM_BP_DIRECT	GO:0007214	gamma-aminobutyric acid signaling pathway	4	0.417101	0.0556091	GABRA2, PLCL2, CACNA1A, GABRG1	593	16	10659	4.49368	1	1	1
GOTERM_BP_DIRECT	GO:0051894	positive regulation of focal adhesion assembly	4	0.417101	0.0556091	COL16A1, KDR, PTPRJ, S100A10	593	16	10659	4.49368	1	1	1
GOTERM_BP_DIRECT	GO:0006493	protein O-linked glycosylation	4	0.417101	0.0556091	GALNT7, GALNT13, PGM3, POMGNT1	593	16	10659	4.49368	1	1	1
GOTERM_BP_DIRECT	GO:0007275	multicellular organism development	8	0.834202	0.059161	PDGFRB, SMO, ASZ1, EBF2, HOXD3, PITX2, DKK1, HOXB5	593	63	10659	2.2825	1	1	1
GOTERM_BP_DIRECT	GO:0030199	collagen fibril organization	5	0.521376	0.0599228	P4HA1, COL5A2, NF1, PLOD3, DDR2	593	27	10659	3.32865	1	1	1
GOTERM_BP_DIRECT	GO:0050680	negative regulation of epithelial cell proliferation	6	0.625652	0.0629907	MEF2C, CDK6, KRT4, MAGED1, GPC3, IFT57	593	39	10659	2.76534	1	1	1
GOTERM_BP_DIRECT	GO:0001947	heart looping	6	0.625652	0.0629907	MEF2C, SMO, ARL13B, HAND2, NPHP3, IFT57	593	39	10659	2.76534	1	1	1
GOTERM_BP_DIRECT	GO:0042384	cilium assembly	9	0.938478	0.0630373	DYNC2LI1, PKHD1, FAM161A, TMEM67, TMEM216, NEK1, RFX3, RPGRIP1L, KIF27	593	77	10659	2.10094	1	1	1
GOTERM_BP_DIRECT	GO:0008285	negative regulation of cell proliferation	17	1.77268	0.0632837	GDF11, CDKN2C, KMT2A, NRK, INCA1, VEGFC, PTPRJ, PROX1, PDS5B, RBPJ, SMARCA2, ZEB1, DLC1, NOX4, ROR2, C23H18ORF54, SOX4	593	190	10659	1.60826	1	1	1
GOTERM_BP_DIRECT	GO:0006888	ER to Golgi vesicle-mediated transport	5	0.521376	0.0669704	LMAN1, SEC23A, CREB3L2, SEC24D, ERGIC1	593	28	10659	3.20977	1	1	1
GOTERM_BP_DIRECT	GO:0001938	positive regulation of endothelial cell proliferation	6	0.625652	0.068857	FLT4, KDR, NF1, PROX1, PRKD1, THBS4	593	40	10659	2.69621	1	1	1
GOTERM_BP_DIRECT	GO:0060993	kidney morphogenesis	3	0.312826	0.0690034	NPHP3, GCNT3, SOX4	593	8	10659	6.74051	1	1	1
GOTERM_BP_DIRECT	GO:0045880	positive regulation of smoothened signaling pathway	4	0.417101	0.074711	INTU, SMO, FGF9, GPC3	593	18	10659	3.99438	1	1	1
GOTERM_BP_DIRECT	GO:0030279	negative regulation of ossification	3	0.312826	0.0855388	MEF2C, CALCA, RBPJ	593	9	10659	5.99157	1	1	1
GOTERM_BP_DIRECT	GO:0048266	behavioral response to pain	3	0.312826	0.0855388	SCN9A, CACNA1A, THBS4	593	9	10659	5.99157	1	1	1
GOTERM_BP_DIRECT	GO:0034446	substrate adhesion-dependent cell spreading	5	0.521376	0.0905313	ITGA4, AKIP1, LAMB1, PARVA, FERMT2	593	31	10659	2.89915	1	1	1

## Sheet: cluster 3
Category	Term		Count	%	PValue	Genes	List Total	Pop Hits	Pop Total	Fold Enrichment	Bonferroni	Benjamini	FDR
GOTERM_BP_DIRECT	GO:0000281	mitotic cytokinesis	9	1.15979	4.01696e-06	ANLN, RACGAP1, PLK1, NUSAP1, CKAP2, KIF23, KIF20A, MYH10, CEP55	502	22	10659	8.68625	0.00626684	0.00449143	0.00449143
GOTERM_BP_DIRECT	GO:0007018	microtubule-based movement	13	1.67526	5.73985e-06	DNAH8, KIF11, KIF17, KIF15, CENPE, KIF18A, KIF19, KIFC1, KIF5C, KIF4A, KIF20A, KIF2B, KIF20B	502	54	10659	5.11166	0.00894267	0.00449143	0.00449143
GOTERM_BP_DIRECT	GO:0055010	ventricular cardiac muscle tissue morphogenesis	6	0.773196	0.000455929	MYL2, COL11A1, TNNC1, MYL3, ISL1, MYH7	502	15	10659	8.49323	0.510167	0.237843	0.237843
GOTERM_BP_DIRECT	GO:0007059	chromosome segregation	8	1.03093	0.00103692	CENPT, TOP2A, CDCA2, CENPW, CENPN, ESCO2, BRCA1, SPC25	502	35	10659	4.85327	0.802818	0.405696	0.405696
GOTERM_BP_DIRECT	GO:0032467	positive regulation of cytokinesis	6	0.773196	0.00244492	RACGAP1, KIF23, CDC6, ECT2, AURKB, CIT	502	21	10659	6.06659	0.978312	0.665473	0.665473
GOTERM_BP_DIRECT	GO:0043524	negative regulation of neuron apoptotic process	11	1.41753	0.00255133	GABRB2, CNTFR, TOX3, NRP1, XRCC2, NEFL, BIRC5, GRIK2, CORO1A, NES, ISL1	502	75	10659	3.11418	0.981647	0.665473	0.665473
GOTERM_BP_DIRECT	GO:0051256	mitotic spindle midzone assembly	3	0.386598	0.00640861	RACGAP1, KIF23, AURKB	502	3	10659	21.2331	0.999957	1	1
GOTERM_BP_DIRECT	GO:0007094	mitotic spindle assembly checkpoint	4	0.515464	0.0070105	PLK1, BUB1B, BUB1, MAD2L1	502	9	10659	9.43692	0.999983	1	1
GOTERM_BP_DIRECT	GO:0043087	regulation of GTPase activity	6	0.773196	0.00768972	EPHA5, CHN1, STMN3, IQGAP2, IQGAP3, PRKG1	502	27	10659	4.71846	0.999994	1	1
GOTERM_BP_DIRECT	GO:0007268	chemical synaptic transmission	7	0.902062	0.010304	GJD2, GRM7, HTR1E, SNCG, SLITRK5, APBA1, SNAP91	502	40	10659	3.71579	1	1	1
GOTERM_BP_DIRECT	GO:0000082	G1/S transition of mitotic cell cycle	6	0.773196	0.0120945	ITGB1, CDKN2D, CCNE1, CDK2, EIF4EBP1, IQGAP3	502	30	10659	4.24661	1	1	1
GOTERM_BP_DIRECT	GO:0007411	axon guidance	9	1.15979	0.0128415	EPHA5, EXT1, RELN, SEMA3C, DPYSL5, PTPRO, CRMP1, MYH10, MATN2	502	67	10659	2.8522	1	1	1
GOTERM_BP_DIRECT	GO:0006821	chloride transport	4	0.515464	0.0165274	GABRA1, GABRA4, GABRA3, SLC26A3	502	12	10659	7.07769	1	1	1
GOTERM_BP_DIRECT	GO:0000086	G2/M transition of mitotic cell cycle	5	0.64433	0.0179718	PLK1, CHEK1, CDC25C, FOXM1, NES	502	22	10659	4.8257	1	1	1
GOTERM_BP_DIRECT	GO:0001666	response to hypoxia	8	1.03093	0.0183615	ALAS2, MB, P2RX2, CAV1, PLAT, PLOD2, HIF3A, LOXL2	502	58	10659	2.9287	1	1	1
GOTERM_BP_DIRECT	GO:0051988	regulation of attachment of spindle microtubules to kinetochore	3	0.386598	0.0200569	RACGAP1, SPAG5, ECT2	502	5	10659	12.7398	1	1	1
GOTERM_BP_DIRECT	GO:0006270	DNA replication initiation	4	0.515464	0.0207489	CCNE2, CCNE1, MCM4, CDC6	502	13	10659	6.53325	1	1	1
GOTERM_BP_DIRECT	GO:0000278	mitotic cell cycle	4	0.515464	0.0207489	CENPT, CENPF, XRCC2, RNF2	502	13	10659	6.53325	1	1	1
GOTERM_BP_DIRECT	GO:0016358	dendrite development	5	0.64433	0.0242522	NRP1, RELN, DAB1, KLHL1, PRKG1	502	24	10659	4.42356	1	1	1
GOTERM_BP_DIRECT	GO:0007156	homophilic cell adhesion via plasma membrane adhesion molecules	9	1.15979	0.0258053	CDH6, PCDH10, LOC101112115, LOC101103720, CDH11, CDH12, PCDH18, CELSR3, CDH7	502	76	10659	2.51444	1	1	1
GOTERM_BP_DIRECT	GO:0021520	spinal cord motor neuron cell fate specification	3	0.386598	0.0291574	ISL2, LHX3, ISL1	502	6	10659	10.6165	1	1	1
GOTERM_BP_DIRECT	GO:0060384	innervation	4	0.515464	0.0307935	GABRB2, UNC13A, ISL1, SULF2	502	15	10659	5.66215	1	1	1
GOTERM_BP_DIRECT	GO:0031623	receptor internalization	5	0.64433	0.0317063	ITGB1, CALCRL, RAB31, CAV1, GRB2	502	26	10659	4.08328	1	1	1
GOTERM_BP_DIRECT	GO:0000910	cytokinesis	5	0.64433	0.0317063	RALA, PRC1, ECT2, AURKC, CIT	502	26	10659	4.08328	1	1	1
GOTERM_BP_DIRECT	GO:0031572	G2 DNA damage checkpoint	4	0.515464	0.0366105	PLK1, CHEK1, BRCA1, DTL	502	16	10659	5.30827	1	1	1
GOTERM_BP_DIRECT	GO:0007214	gamma-aminobutyric acid signaling pathway	4	0.515464	0.0366105	GABRA1, PLCL1, GABRA4, GABRA3	502	16	10659	5.30827	1	1	1
GOTERM_BP_DIRECT	GO:0051301	cell division	6	0.773196	0.0381464	ASPM, CDCA2, SPAG5, CDK1, CDC6, CKS1B	502	40	10659	3.18496	1	1	1
GOTERM_BP_DIRECT	GO:0045666	positive regulation of neuron differentiation	6	0.773196	0.0381464	NCOA1, DAB1, BRINP1, TCF12, ECT2, BEND6	502	40	10659	3.18496	1	1	1
GOTERM_BP_DIRECT	GO:0034501	protein localization to kinetochore	3	0.386598	0.0395665	CDK1, BUB1B, AURKB	502	7	10659	9.09989	1	1	1
GOTERM_BP_DIRECT	GO:0003073	regulation of systemic arterial blood pressure	3	0.386598	0.0395665	DDAH1, NCALD, SLC4A5	502	7	10659	9.09989	1	1	1
GOTERM_BP_DIRECT	GO:0048048	embryonic eye morphogenesis	3	0.386598	0.0395665	FBN2, EFEMP1, RARB	502	7	10659	9.09989	1	1	1
GOTERM_BP_DIRECT	GO:0007080	mitotic metaphase plate congression	5	0.64433	0.0451446	CCNB1, KIF18A, PSRC1, KIFC1, CDCA8	502	29	10659	3.66087	1	1	1
GOTERM_BP_DIRECT	GO:0007052	mitotic spindle organization	4	0.515464	0.0497931	CCNB1, STIL, NDC80, SPC25	502	18	10659	4.71846	1	1	1
GOTERM_BP_DIRECT	GO:0055003	cardiac myofibril assembly	3	0.386598	0.0511415	ACTC1, MYL2, MYH10	502	8	10659	7.9624	1	1	1
GOTERM_BP_DIRECT	GO:0060020	Bergmann glial cell differentiation	3	0.386598	0.0511415	VIM, PLPP3, GFAP	502	8	10659	7.9624	1	1	1
GOTERM_BP_DIRECT	GO:0007155	cell adhesion	10	1.28866	0.0556017	POSTN, NLGN4X, TNFAIP6, NCAN, CNTN1, SPP1, TNC, STAB2, TGFBI, LYVE1	502	104	10659	2.04164	1	1	1
GOTERM_BP_DIRECT	GO:0048599	oocyte development	3	0.386598	0.0637504	STRA8, MEIOC, AURKC	502	9	10659	7.07769	1	1	1
GOTERM_BP_DIRECT	GO:0006265	DNA topological change	3	0.386598	0.0637504	TOP2A, LOC101106722, HMGB2	502	9	10659	7.07769	1	1	1
GOTERM_BP_DIRECT	GO:0010628	positive regulation of gene expression	11	1.41753	0.063837	SFRP4, LOC101106722, WHRN, CAV1, CNTN1, FN1, TNC, HMGB2, VIM, LDLR, IQGAP3	502	123	10659	1.89889	1	1	1
GOTERM_BP_DIRECT	GO:0001937	negative regulation of endothelial cell proliferation	4	0.515464	0.0649548	CAV2, TNMD, CAV1, GDF2	502	20	10659	4.24661	1	1	1
GOTERM_BP_DIRECT	GO:0010575	positive regulation of vascular endothelial growth factor production	4	0.515464	0.0649548	HPSE, BRCA1, ISL1, SULF2	502	20	10659	4.24661	1	1	1
GOTERM_BP_DIRECT	GO:0001578	microtubule bundle formation	4	0.515464	0.0732377	PSRC1, PRC1, PLK1, KIF20A	502	21	10659	4.04439	1	1	1
GOTERM_BP_DIRECT	GO:0045600	positive regulation of fat cell differentiation	5	0.64433	0.073545	FRZB, DKKL1, SNAI2, HTR2A, MEDAG	502	34	10659	3.12251	1	1	1
GOTERM_BP_DIRECT	GO:0021680	cerebellar Purkinje cell layer development	3	0.386598	0.0772708	KLHL1, SEZ6L2, MYH10	502	10	10659	6.36992	1	1	1
GOTERM_BP_DIRECT	GO:0033198	response to ATP	3	0.386598	0.0772708	P2RX5, TRPC3, P2RX2	502	10	10659	6.36992	1	1	1
GOTERM_BP_DIRECT	GO:0019228	neuronal action potential	3	0.386598	0.0772708	KCNA1, GRIK2, SCN1A	502	10	10659	6.36992	1	1	1
GOTERM_BP_DIRECT	GO:0050731	positive regulation of peptidyl-tyrosine phosphorylation	6	0.773196	0.0901456	NRP1, YES1, ENPP2, TREM2, HTR2A, PLPP3	502	51	10659	2.49801	1	1	1
GOTERM_BP_DIRECT	GO:0060048	cardiac muscle contraction	4	0.515464	0.0911132	MYL2, TNNC1, MYL3, MYH7	502	23	10659	3.69271	1	1	1
GOTERM_BP_DIRECT	GO:2000811	negative regulation of anoikis	3	0.386598	0.0915894	ITGB1, CAV1, SNAI2	502	11	10659	5.79084	1	1	1
GOTERM_BP_DIRECT	GO:0045109	intermediate filament organization	3	0.386598	0.0915894	VIM, KRT20, GFAP	502	11	10659	5.79084	1	1	1
GOTERM_BP_DIRECT	GO:0007076	mitotic chromosome condensation	3	0.386598	0.0915894	NUSAP1, NCAPG, SMC2	502	11	10659	5.79084	1	1	1
GOTERM_BP_DIRECT	GO:0014012	peripheral nervous system axon regeneration	2	0.257732	0.0918	TNC, NEFL	502	2	10659	21.2331	1	1	1
GOTERM_BP_DIRECT	GO:0046578	regulation of Ras protein signal transduction	2	0.257732	0.0918	PLCE1, FOXM1	502	2	10659	21.2331	1	1	1
GOTERM_BP_DIRECT	GO:0000915	actomyosin contractile ring assembly	2	0.257732	0.0918	RACGAP1, KIF23	502	2	10659	21.2331	1	1	1

## Sheet: cluster 4
Category	Term		Count	%	PValue	Genes	List Total	Pop Hits	Pop Total	Fold Enrichment	Bonferroni	Benjamini	FDR
GOTERM_BP_DIRECT	GO:0008360	regulation of cell shape	13	1.57576	0.000195183	SEMA4A, DMTN, SEMA4D, SEMA3E, BAIAP2, SYNE3, FGR, VIL1, SPTA1, BAMBI, CDC42EP1, MYH9, ALDOA	537	71	10659	3.63435	0.313235	0.279087	0.279087
GOTERM_BP_DIRECT	GO:0031032	actomyosin structure organization	6	0.727273	0.000289961	EPB41L4B, CNN1, MYO18A, MYH9, MYH14, F11R	537	13	10659	9.16115	0.427794	0.279087	0.279087
GOTERM_BP_DIRECT	GO:0002260	lymphocyte homeostasis	4	0.484848	0.000486953	SPTA1, SLC40A1, SKIL, LAT	537	4	10659	19.8492	0.608439	0.312462	0.312462
GOTERM_BP_DIRECT	GO:0050727	regulation of inflammatory response	8	0.969697	0.00106488	SEMA7A, PGLYRP2, TNIP1, AHSG, NR1D2, JAK2, ESR1, TLR4	537	33	10659	4.81192	0.871393	0.453881	0.453881
GOTERM_BP_DIRECT	GO:0032689	negative regulation of interferon-gamma production	6	0.727273	0.00117891	IL33, PRNP, IL1RL1, PGLYRP2, PGLYRP1, TLR4	537	17	10659	7.00559	0.896765	0.453881	0.453881
GOTERM_BP_DIRECT	GO:0007229	integrin-mediated signaling pathway	10	1.21212	0.00321734	VAV3, FGR, LAMA5, SEMA7A, ITGA3, ITGA7, ITGB6, CDH17, LAT, CTGF	537	61	10659	3.25396	0.997977	0.902328	0.902328
GOTERM_BP_DIRECT	GO:0007193	adenylate cyclase-inhibiting G-protein coupled receptor signaling pathway	6	0.727273	0.00328119	GPR37, PTGDR2, HTR1D, S1PR1, S1PR3, SSTR2	537	21	10659	5.67119	0.998212	0.902328	0.902328
GOTERM_BP_DIRECT	GO:0050830	defense response to Gram-positive bacterium	7	0.848485	0.00634708	FGR, PGLYRP2, RIPK2, ACP5, TNFSF8, PGLYRP1, B2M	537	34	10659	4.08659	0.999995	1	1
GOTERM_BP_DIRECT	GO:0030855	epithelial cell differentiation	8	0.969697	0.00672187	FZD1, VIL1, EHF, ELF3, PTER, TST, ID3, BMP7	537	45	10659	3.52874	0.999998	1	1
GOTERM_BP_DIRECT	GO:0031069	hair follicle morphogenesis	5	0.606061	0.0070931	KRT71, WNT10A, KRT27, KRT25, SOSTDC1	537	16	10659	6.20286	0.999999	1	1
GOTERM_BP_DIRECT	GO:0030155	regulation of cell adhesion	6	0.727273	0.0072575	PPP1CB, STAT5A, LAMA5, NUAK1, S1PR1, LMO7	537	25	10659	4.7638	0.999999	1	1
GOTERM_BP_DIRECT	GO:0050732	negative regulation of peptidyl-tyrosine phosphorylation	4	0.484848	0.0116382	DMTN, SEMA4D, PTPN6, SAMSN1	537	10	10659	7.93966	1	1	1
GOTERM_BP_DIRECT	GO:0001558	regulation of cell growth	6	0.727273	0.0118619	DDR1, IGFBP2, WISP3, IGFBP7, WISP2, CTGF	537	28	10659	4.25339	1	1	1
GOTERM_BP_DIRECT	GO:0045429	positive regulation of nitric oxide biosynthetic process	5	0.606061	0.0134052	ESR1, TLR4, ASS1, EGFR, KLF2	537	19	10659	5.22346	1	1	1
GOTERM_BP_DIRECT	GO:0006658	phosphatidylserine metabolic process	3	0.363636	0.0141524	SERINC3, SERINC2, SERINC5	537	4	10659	14.8869	1	1	1
GOTERM_BP_DIRECT	GO:1902714	negative regulation of interferon-gamma secretion	3	0.363636	0.0141524	NR1H4, IL36RN, SLAMF1	537	4	10659	14.8869	1	1	1
GOTERM_BP_DIRECT	GO:0007155	cell adhesion	12	1.45455	0.0152125	SELP, FERMT1, SELL, CNTN5, ITGA3, LOC101114586, NECTIN4, F11R, ATP1B1, GRHL2, CTNNAL1, HAPLN1	537	104	10659	2.29029	1	1	1
GOTERM_BP_DIRECT	GO:0001525	angiogenesis	11	1.33333	0.015749	NRP2, KLF5, HEY1, FZD5, LEPR, S1PR1, MYH9, EPHB1, SAT1, PLCD1, CTGF	537	91	10659	2.39935	1	1	1
GOTERM_BP_DIRECT	GO:0046330	positive regulation of JNK cascade	7	0.848485	0.0157891	GADD45B, RIPK2, SERPINF2, F2RL1, TLR4, SLAMF1, CTGF	537	41	10659	3.38888	1	1	1
GOTERM_BP_DIRECT	GO:0000122	negative regulation of transcription from RNA polymerase II promoter	26	3.15152	0.01653	HDAC5, NOTCH3, DLX1, RARG, ZNF296, VLDLR, EDNRB, MYB, HSF4, ZNF366, WDTC1, SPDEF, TLE4, CBX7, SEMA4D, MITF, ESR1, ETV6, BMP4, RIPPLY3, PER3, KLF5, ID1, TXNIP, ID3, CPEB3	537	316	10659	1.63316	1	1	1
GOTERM_BP_DIRECT	GO:0007605	sensory perception of sound	10	1.21212	0.0186089	CLIC5, SPTBN4, CEMIP, USP53, CNTN5, MARVELD2, ATP8B1, CDH23, MYH14, SLC1A3	537	80	10659	2.48115	1	1	1
GOTERM_BP_DIRECT	GO:0030500	regulation of bone mineralization	4	0.484848	0.0197959	MGP, MATN1, BMP2K, S1PR1	537	12	10659	6.61639	1	1	1
GOTERM_BP_DIRECT	GO:0048733	sebaceous gland development	3	0.363636	0.0228061	CBX7, WNT10A, ZDHHC21	537	5	10659	11.9095	1	1	1
GOTERM_BP_DIRECT	GO:0009253	peptidoglycan catabolic process	3	0.363636	0.0228061	PGLYRP2, LYG2, PGLYRP1	537	5	10659	11.9095	1	1	1
GOTERM_BP_DIRECT	GO:0042310	vasoconstriction	4	0.484848	0.024792	EDN1, EDNRB, HTR1D, HTR1B	537	13	10659	6.10743	1	1	1
GOTERM_BP_DIRECT	GO:0045944	positive regulation of transcription from RNA polymerase II promoter	33	4	0.0259697	HDAC5, NOTCH3, RARG, CALCOCO1, IL25, AGAP2, SLC40A1, ADRB2, EGFR, ARNTL, SERTAD1, ZMIZ2, MYB, HSF4, SPDEF, ZBTB7C, STAT5A, IL33, JAG1, FZD5, SERPINF2, BMP7, FOSL2, MLXIPL, TEF, CCPG1, LHX2, F2RL1, CDH13, IRF5, TNFSF8, MAML3, TLR4	537	445	10659	1.47196	1	1	1
GOTERM_BP_DIRECT	GO:0045787	positive regulation of cell cycle	5	0.606061	0.0261451	TGM1, CITED2, CCPG1, GDPD5, SLC6A4	537	23	10659	4.31504	1	1	1
GOTERM_BP_DIRECT	GO:0030220	platelet formation	4	0.484848	0.0304009	ACTN1, MYH9, PTPN6, ZNF385A	537	14	10659	5.67119	1	1	1
GOTERM_BP_DIRECT	GO:0043065	positive regulation of apoptotic process	11	1.33333	0.0321286	BMP4, RARG, GRIN2A, GADD45B, RIPK2, TNFRSF8, IRF5, NUPR1, BMP7, DUSP6, SPDEF	537	102	10659	2.1406	1	1	1
GOTERM_BP_DIRECT	GO:0060687	regulation of branching involved in prostate gland morphogenesis	3	0.363636	0.0330811	BMP4, BMP7, ESR1	537	6	10659	9.92458	1	1	1
GOTERM_BP_DIRECT	GO:0001817	regulation of cytokine production	3	0.363636	0.0330811	ELF1, F11R, LITAF	537	6	10659	9.92458	1	1	1
GOTERM_BP_DIRECT	GO:0043401	steroid hormone mediated signaling pathway	3	0.363636	0.0330811	BMP4, BMP7, ESR1	537	6	10659	9.92458	1	1	1
GOTERM_BP_DIRECT	GO:0042475	odontogenesis of dentin-containing tooth	6	0.727273	0.0364136	BMP4, LAMA5, DLX1, DLX3, SOSTDC1, BMP7	537	37	10659	3.21878	1	1	1
GOTERM_BP_DIRECT	GO:0070830	bicellular tight junction assembly	4	0.484848	0.0366169	MARVELD2, ACTN4, CLDN1, GRHL2	537	15	10659	5.29311	1	1	1
GOTERM_BP_DIRECT	GO:0040018	positive regulation of multicellular organism growth	5	0.606061	0.0442951	VIL1, STAT5A, GHSR, SPTBN4, PLS1	537	27	10659	3.67577	1	1	1
GOTERM_BP_DIRECT	GO:0006665	sphingolipid metabolic process	3	0.363636	0.044793	SERINC3, SERINC2, SERINC5	537	7	10659	8.50678	1	1	1
GOTERM_BP_DIRECT	GO:1900121	negative regulation of receptor binding	3	0.363636	0.044793	CRTAC1, B2M, PTPRF	537	7	10659	8.50678	1	1	1
GOTERM_BP_DIRECT	GO:0010628	positive regulation of gene expression	12	1.45455	0.0452403	ACTA2, PTGFR, EPB41L4B, WNT10A, C1QTNF1, NFIL3, CTSH, ALOX12B, LRRC32, MT3, ACTG2, SLC6A4	537	123	10659	1.9365	1	1	1
GOTERM_BP_DIRECT	GO:0006954	inflammatory response	12	1.45455	0.047503	SELP, AFAP1L2, ELF3, IL25, RARRES2, HRH4, S1PR3, ITGB6, MS4A2, TLR4, CCR3, LAT	537	124	10659	1.92089	1	1	1
GOTERM_BP_DIRECT	GO:0043407	negative regulation of MAP kinase activity	5	0.606061	0.0497006	BMP4, RGS2, STK38, PTPN6, BMP7	537	28	10659	3.54449	1	1	1
GOTERM_BP_DIRECT	GO:0070374	positive regulation of ERK1 and ERK2 cascade	10	1.21212	0.054724	BMP4, SEMA7A, RIPK2, SERPINF2, F2RL1, MT3, TLR4, EGFR, SLAMF1, CTGF	537	97	10659	2.04631	1	1	1
GOTERM_BP_DIRECT	GO:0001942	hair follicle development	5	0.606061	0.0554518	LAMA5, LHX2, ZDHHC21, LGR5, EGFR	537	29	10659	3.42227	1	1	1
GOTERM_BP_DIRECT	GO:0007169	transmembrane receptor protein tyrosine kinase signaling pathway	5	0.606061	0.0554518	DOK4, ERBB2, CSPG4, MST1R, GFRA2	537	29	10659	3.42227	1	1	1
GOTERM_BP_DIRECT	GO:2000484	positive regulation of interleukin-8 secretion	3	0.363636	0.0577719	F2RL1, FFAR2, CD244	537	8	10659	7.44344	1	1	1
GOTERM_BP_DIRECT	GO:0071398	cellular response to fatty acid	3	0.363636	0.0577719	NR1H4, PDK3, FFAR2	537	8	10659	7.44344	1	1	1
GOTERM_BP_DIRECT	GO:0007009	plasma membrane organization	3	0.363636	0.0577719	SPTA1, BAIAP2, MTSS1	537	8	10659	7.44344	1	1	1
GOTERM_BP_DIRECT	GO:0045746	negative regulation of Notch signaling pathway	4	0.484848	0.0587895	DLX1, HEY1, GDPD5, BMP7	537	18	10659	4.41092	1	1	1
GOTERM_BP_DIRECT	GO:0010800	positive regulation of peptidyl-threonine phosphorylation	4	0.484848	0.0587895	CEMIP, CAB39, RIPK2, BMP7	537	18	10659	4.41092	1	1	1
GOTERM_BP_DIRECT	GO:0032715	negative regulation of interleukin-6 production	4	0.484848	0.0587895	NR1H4, IL36RN, TLR4, SLAMF1	537	18	10659	4.41092	1	1	1
GOTERM_BP_DIRECT	GO:0006730	one-carbon metabolic process	4	0.484848	0.0672991	AHCYL2, CA5A, CA9, GNMT	537	19	10659	4.17877	1	1	1
GOTERM_BP_DIRECT	GO:0048661	positive regulation of smooth muscle cell proliferation	4	0.484848	0.0672991	BMP4, NOTCH3, SERPINF2, CDH13	537	19	10659	4.17877	1	1	1
GOTERM_BP_DIRECT	GO:0030335	positive regulation of cell migration	9	1.09091	0.0706401	FGR, SUN2, GRB7, CEMIP, SEMA4D, CDH13, ACTN4, EGFR, MYLK	537	87	10659	2.05336	1	1	1
GOTERM_BP_DIRECT	GO:0007422	peripheral nervous system development	3	0.363636	0.0718613	EDNRB, CITED2, ERBB2	537	9	10659	6.61639	1	1	1
GOTERM_BP_DIRECT	GO:0008206	bile acid metabolic process	3	0.363636	0.0718613	ATP8B1, NR1H4, ACAA1	537	9	10659	6.61639	1	1	1
GOTERM_BP_DIRECT	GO:0032060	bleb assembly	3	0.363636	0.0718613	LPAR3, EMP2, MYLK	537	9	10659	6.61639	1	1	1
GOTERM_BP_DIRECT	GO:0014068	positive regulation of phosphatidylinositol 3-kinase signaling	6	0.727273	0.0739221	FGR, SELP, SEMA4D, UNC5B, F2RL1, PTPN6	537	45	10659	2.64655	1	1	1
GOTERM_BP_DIRECT	GO:0035584	calcium-mediated signaling using intracellular calcium source	3	0.363636	0.086917	SELP, PTGFR, DMTN	537	10	10659	5.95475	1	1	1
GOTERM_BP_DIRECT	GO:0034142	toll-like receptor 4 signaling pathway	3	0.363636	0.086917	RIPK2, NR1H4, TLR4	537	10	10659	5.95475	1	1	1
GOTERM_BP_DIRECT	GO:0048596	embryonic camera-type eye morphogenesis	3	0.363636	0.086917	FZD5, CITED2, BMP7	537	10	10659	5.95475	1	1	1
GOTERM_BP_DIRECT	GO:0043433	negative regulation of sequence-specific DNA binding transcription factor activity	5	0.606061	0.0969619	PRNP, SFRP5, ID1, ID3, ESR1	537	35	10659	2.83559	1	1	1
GOTERM_BP_DIRECT	GO:0006955	immune response	13	1.57576	0.097326	LOC101109220, TNFSF14, LOC101110855, LOC101110545, SMAD6, LOC101105274, CX3CL1, NFIL3, TNFSF10, TNFSF8, MS4A2, B2M, LAT	537	157	10659	1.64356	1	1	1
GOTERM_BP_DIRECT	GO:1902896	terminal web assembly	2	0.242424	0.0980481	VIL1, PLS1	537	2	10659	19.8492	1	1	1
GOTERM_BP_DIRECT	GO:0072104	glomerular capillary formation	2	0.242424	0.0980481	BMP4, NOTCH3	537	2	10659	19.8492	1	1	1
GOTERM_BP_DIRECT	GO:0072125	negative regulation of glomerular mesangial cell proliferation	2	0.242424	0.0980481	BMP4, BMP7	537	2	10659	19.8492	1	1	1
GOTERM_BP_DIRECT	GO:0030518	intracellular steroid hormone receptor signaling pathway	2	0.242424	0.0980481	CALCOCO1, ESR1	537	2	10659	19.8492	1	1	1
GOTERM_BP_DIRECT	GO:0001951	intestinal D-glucose absorption	2	0.242424	0.0980481	VIL1, PLS1	537	2	10659	19.8492	1	1	1
GOTERM_BP_DIRECT	GO:0010907	positive regulation of glucose metabolic process	2	0.242424	0.0980481	SLC45A3, PMAIP1	537	2	10659	19.8492	1	1	1
GOTERM_BP_DIRECT	GO:0033088	negative regulation of immature T cell proliferation in thymus	2	0.242424	0.0980481	BMP4, ERBB2	537	2	10659	19.8492	1	1	1
GOTERM_BP_DIRECT	GO:0002826	negative regulation of T-helper 1 type immune response	2	0.242424	0.0980481	IL33, IL1RL1	537	2	10659	19.8492	1	1	1

## Sheet: cluster 5
Category	Term		Count	%	PValue	Genes	List Total	Pop Hits	Pop Total	Fold Enrichment	Bonferroni	Benjamini	FDR
GOTERM_BP_DIRECT	GO:0009953	dorsal/ventral pattern formation	7	0.873908	0.000108791	DYNC2H1, IFT52, HHIP, IFT172, HOXA2, LRP4, GLI1	464	19	10659	8.46336	0.161593	0.152479	0.152479
GOTERM_BP_DIRECT	GO:0030324	lung development	10	1.24844	0.000188245	PDGFRA, MMP14, DNAAF1, ZFPM2, GLI1, ACVR2B, HSPB11, GLI3, CCDC40, GLI2	464	48	10659	4.78583	0.262866	0.152479	0.152479
GOTERM_BP_DIRECT	GO:0090090	negative regulation of canonical Wnt signaling pathway	11	1.37328	0.00128394	SOX2, DAB2, SFRP2, DACT3, LRP4, LIMD1, GLI1, SOX10, GLI3, BICC1, CTHRC1	464	74	10659	3.41475	0.875234	0.401953	0.401953
GOTERM_BP_DIRECT	GO:0002076	osteoblast development	5	0.62422	0.00131656	SMAD3, HOXA2, PTH1R, LIMD1, GLI2	464	12	10659	9.57166	0.881664	0.401953	0.401953
GOTERM_BP_DIRECT	GO:0021987	cerebral cortex development	7	0.873908	0.00158592	NTRK2, COL3A1, MDK, FAT4, WDR62, PLCB1, FOXP2	464	30	10659	5.36013	0.923559	0.401953	0.401953
GOTERM_BP_DIRECT	GO:0007507	heart development	12	1.49813	0.00172748	COL3A1, TGFB2, IFT140, GNAQ, DNAH5, SH3PXD2B, ACVR2B, HSPB11, GLI3, BICC1, NFATC4, GLI2	464	90	10659	3.06293	0.939247	0.401953	0.401953
GOTERM_BP_DIRECT	GO:0030317	sperm motility	8	0.998752	0.00173684	DNAH1, CATSPER2, SLC22A16, DNAH5, TEKT3, AKAP4, GAS8, CCDC40	464	41	10659	4.48234	0.940162	0.401953	0.401953
GOTERM_BP_DIRECT	GO:0060831	smoothened signaling pathway involved in dorsal/ventral neural tube patterning	4	0.499376	0.00250023	PTCH1, TULP3, GLI3, GLI2	464	7	10659	13.1268	0.982672	0.506297	0.506297
GOTERM_BP_DIRECT	GO:0042733	embryonic digit morphogenesis	8	0.998752	0.00343128	IFT52, SFRP2, CHST11, GNAQ, TULP3, LRP4, GLI3, GLI2	464	46	10659	3.99513	0.996183	0.587309	0.587309
GOTERM_BP_DIRECT	GO:0007179	transforming growth factor beta receptor signaling pathway	8	0.998752	0.00388442	COL3A1, FUT8, TGFB2, SMAD3, CITED1, SRC, TGFB3, ARRB2	464	47	10659	3.91012	0.998173	0.587309	0.587309
GOTERM_BP_DIRECT	GO:0042475	odontogenesis of dentin-containing tooth	7	0.873908	0.00480445	PDGFRA, LRP4, ACVR2B, GLI3, FGF10, LHX8, GLI2	464	37	10659	4.34605	0.999591	0.587309	0.587309
GOTERM_BP_DIRECT	GO:0051965	positive regulation of synapse assembly	8	0.998752	0.00492528	NTRK2, SLITRK2, LRRN3, BDNF, LRRTM2, FLRT1, SLITRK6, EPHB2	464	49	10659	3.75053	0.999664	0.587309	0.587309
GOTERM_BP_DIRECT	GO:0016049	cell growth	6	0.749064	0.00552923	TGFB2, TGFB3, NDNF, ROS1, RASGRP4, PAK5	464	27	10659	5.10489	0.999874	0.587309	0.587309
GOTERM_BP_DIRECT	GO:0030199	collagen fibril organization	6	0.749064	0.00552923	ADAMTS14, COL3A1, TGFB2, COL2A1, SFRP2, SERPINH1	464	27	10659	5.10489	0.999874	0.587309	0.587309
GOTERM_BP_DIRECT	GO:0042384	cilium assembly	10	1.24844	0.00596577	DYNC2H1, TTC8, IFT140, TMEM138, IFT172, DZIP1L, RFX2, NME5, CEP89, TTBK2	464	77	10659	2.98337	0.999938	0.587309	0.587309
GOTERM_BP_DIRECT	GO:0050731	positive regulation of peptidyl-tyrosine phosphorylation	8	0.998752	0.00616312	IL5, ANGPT1, CD81, SRC, HGF, LRP4, FGF10, VEGFA	464	51	10659	3.60345	0.999955	0.587309	0.587309
GOTERM_BP_DIRECT	GO:0007224	smoothened signaling pathway	8	0.998752	0.00616312	IFT52, PTCHD1, HHIP, IFT172, BOC, GLI1, HSPB11, HES5	464	51	10659	3.60345	0.999955	0.587309	0.587309
GOTERM_BP_DIRECT	GO:0007605	sensory perception of sound	10	1.24844	0.00765257	TUB, COL2A1, MYO15A, MYO3A, HOXA1, TSPEAR, SOBP, DNM1, FGFR1, OTOGL	464	80	10659	2.8715	0.999996	0.633069	0.633069
GOTERM_BP_DIRECT	GO:0008589	regulation of smoothened signaling pathway	4	0.499376	0.00777483	IFT140, TCTN1, FGF10, GLI2	464	10	10659	9.18879	0.999997	0.633069	0.633069
GOTERM_BP_DIRECT	GO:0060326	cell chemotaxis	7	0.873908	0.00803151	CCL25, PDGFRA, HGF, LPAR1, ELMO2, ARRB2, CCL28	464	41	10659	3.92205	0.999998	0.633069	0.633069
GOTERM_BP_DIRECT	GO:0007411	axon guidance	9	1.1236	0.00820645	TTC8, TGFB2, LMX1A, BOC, CNTN2, CNTN4, MAPK8IP3, GLI3, GLI2	464	67	10659	3.08579	0.999998	0.633069	0.633069
GOTERM_BP_DIRECT	GO:0048589	developmental growth	5	0.62422	0.00978103	SMAD3, CHST11, SOX10, GLI3, GLI2	464	20	10659	5.743	1	0.663978	0.663978
GOTERM_BP_DIRECT	GO:0001658	branching involved in ureteric bud morphogenesis	6	0.749064	0.0100952	ADAMTS16, EYA1, PTCH1, FAT4, PKD2, GLI3	464	31	10659	4.44619	1	0.663978	0.663978
GOTERM_BP_DIRECT	GO:0045665	negative regulation of neuron differentiation	7	0.873908	0.010126	SOX2, LMX1A, CNTN2, HOXA2, CNTN4, NR2E1, GLI3	464	43	10659	3.73963	1	0.663978	0.663978
GOTERM_BP_DIRECT	GO:0060665	regulation of branching involved in salivary gland morphogenesis by mesenchymal-epithelial signaling	3	0.374532	0.0106564	HGF, FGFR1, FGF10	464	4	10659	17.229	1	0.663978	0.663978
GOTERM_BP_DIRECT	GO:0080154	regulation of fertilization	3	0.374532	0.0106564	FAM170B, TEKT3, PLCB1	464	4	10659	17.229	1	0.663978	0.663978
GOTERM_BP_DIRECT	GO:0045740	positive regulation of DNA replication	5	0.62422	0.0116761	PDGFRA, TGFB3, GLI1, FGF10, GLI2	464	21	10659	5.46952	1	0.700563	0.700563
GOTERM_BP_DIRECT	GO:0007368	determination of left/right symmetry	6	0.749064	0.0148674	DYNC2H1, IFT140, DNAH5, ACVR2B, BICC1, FGF10	464	34	10659	4.05388	1	0.846929	0.846929
GOTERM_BP_DIRECT	GO:0060041	retina development in camera-type eye	6	0.749064	0.0167438	TUB, NTRK2, TGIF2, IFT140, NR2E1, CLCN2	464	35	10659	3.93805	1	0.846929	0.846929
GOTERM_BP_DIRECT	GO:0045216	cell-cell junction organization	4	0.499376	0.0168178	CLDN6, TGFB2, SMAD3, TGFB3	464	13	10659	7.0683	1	0.846929	0.846929
GOTERM_BP_DIRECT	GO:0071907	determination of digestive tract left/right asymmetry	3	0.374532	0.0172523	DNAAF1, MEGF8, CCDC40	464	5	10659	13.7832	1	0.846929	0.846929
GOTERM_BP_DIRECT	GO:0097094	craniofacial suture morphogenesis	3	0.374532	0.0172523	MMP14, MEGF8, FREM1	464	5	10659	13.7832	1	0.846929	0.846929
GOTERM_BP_DIRECT	GO:0050920	regulation of chemotaxis	3	0.374532	0.0172523	PDGFRA, ADGRA2, CXCR4	464	5	10659	13.7832	1	0.846929	0.846929
GOTERM_BP_DIRECT	GO:0048469	cell maturation	5	0.62422	0.0187143	IL15, PTH1R, SOX10, HES5, FGFR1	464	24	10659	4.78583	1	0.891683	0.891683
GOTERM_BP_DIRECT	GO:1903861	positive regulation of dendrite extension	4	0.499376	0.0207269	CPNE9, CPNE5, SYT1, CPNE6	464	14	10659	6.56342	1	0.95936	0.95936
GOTERM_BP_DIRECT	GO:0031532	actin cytoskeleton reorganization	6	0.749064	0.0232946	S1PR2, PARVB, TNIK, S100A9, ANTXR1, FGF10	464	38	10659	3.62716	1	1	1
GOTERM_BP_DIRECT	GO:0071910	determination of liver left/right asymmetry	3	0.374532	0.0251403	DNAAF1, PKD2, CCDC40	464	6	10659	11.486	1	1	1
GOTERM_BP_DIRECT	GO:0050680	negative regulation of epithelial cell proliferation	6	0.749064	0.0257985	SOX2, IFT52, TGFB2, SFRP2, PTCH1, IFT172	464	39	10659	3.53415	1	1	1
GOTERM_BP_DIRECT	GO:0001947	heart looping	6	0.749064	0.0257985	IFT52, SMAD3, DNAAF1, IFT172, PKD2, CCDC40	464	39	10659	3.53415	1	1	1
GOTERM_BP_DIRECT	GO:0001701	in utero embryonic development	13	1.62297	0.0262901	PDGFRA, SMAD3, ANGPT1, PTCH1, PCGF2, MAPK8IP3, SOX10, GLI3, GLI2, TCTN1, SOX6, ZFPM2, FGFR1	464	147	10659	2.03154	1	1	1
GOTERM_BP_DIRECT	GO:0003007	heart morphogenesis	4	0.499376	0.0299078	TGFB2, COL2A1, PTCH1, FAT4	464	16	10659	5.743	1	1	1
GOTERM_BP_DIRECT	GO:0007585	respiratory gaseous exchange	4	0.499376	0.0299078	FUT8, CHST11, LECT1, MAPK8IP3	464	16	10659	5.743	1	1	1
GOTERM_BP_DIRECT	GO:0007420	brain development	7	0.873908	0.0312277	SLC6A17, CITED1, MAP1S, PTCH1, IFT172, TULP3, UNC5C	464	55	10659	2.92371	1	1	1
GOTERM_BP_DIRECT	GO:0042473	outer ear morphogenesis	3	0.374532	0.0341963	EYA1, HOXA1, FGFR1	464	7	10659	9.84514	1	1	1
GOTERM_BP_DIRECT	GO:0060122	inner ear receptor stereocilium organization	4	0.499376	0.0351754	TTC8, FAT4, HES5, CTHRC1	464	17	10659	5.40517	1	1	1
GOTERM_BP_DIRECT	GO:0001654	eye development	4	0.499376	0.0351754	SOX2, TGFB2, SALL2, SH3PXD2B	464	17	10659	5.40517	1	1	1
GOTERM_BP_DIRECT	GO:0007169	transmembrane receptor protein tyrosine kinase signaling pathway	5	0.62422	0.0353145	NTRK2, CLNK, ROR1, ROS1, ANGPTL1	464	29	10659	3.96069	1	1	1
GOTERM_BP_DIRECT	GO:0060021	palate development	7	0.873908	0.0363878	PDGFRA, COL2A1, IFT172, INHBA, EPHB2, ACVR2B, GLI3	464	57	10659	2.82112	1	1	1
GOTERM_BP_DIRECT	GO:0007155	cell adhesion	10	1.24844	0.0367239	LAMA1, ITGA11, CERCAM, CNTN2, SUSD5, PARVB, TLN2, CNTN4, MPDZ, HES5	464	104	10659	2.20884	1	1	1
GOTERM_BP_DIRECT	GO:0008543	fibroblast growth factor receptor signaling pathway	5	0.62422	0.0393978	FGF19, FLRT1, FAT4, FGF12, FRS3	464	30	10659	3.82866	1	1	1
GOTERM_BP_DIRECT	GO:0009954	proximal/distal pattern formation	4	0.499376	0.0408872	LRP4, GLI1, GLI3, GLI2	464	18	10659	5.10489	1	1	1
GOTERM_BP_DIRECT	GO:0021983	pituitary gland development	4	0.499376	0.0408872	SOX2, GLI1, FGF10, GLI2	464	18	10659	5.10489	1	1	1
GOTERM_BP_DIRECT	GO:0009791	post-embryonic development	7	0.873908	0.0420648	CHST11, GNAQ, INPPL1, SOX6, ACVR2B, MAPK8IP3, FOXP2	464	59	10659	2.72549	1	1	1
GOTERM_BP_DIRECT	GO:0090103	cochlea morphogenesis	4	0.499376	0.0470353	EYA1, HOXA1, CTHRC1, GLI2	464	19	10659	4.83621	1	1	1
GOTERM_BP_DIRECT	GO:0045668	negative regulation of osteoblast differentiation	5	0.62422	0.0483376	SMAD3, CITED1, PTCH1, HOXA2, LIMD1	464	32	10659	3.58937	1	1	1
GOTERM_BP_DIRECT	GO:0001649	osteoblast differentiation	8	0.998752	0.0493111	SOX2, MRC2, BMP3, COL6A1, ITGA11, TMEM119, ALPL, GLI1	464	77	10659	2.3867	1	1	1
GOTERM_BP_DIRECT	GO:0048704	embryonic skeletal system morphogenesis	5	0.62422	0.0531929	EYA1, PCGF2, HOXA3, MEGF8, GLI3	464	33	10659	3.4806	1	1	1
GOTERM_BP_DIRECT	GO:0042472	inner ear morphogenesis	5	0.62422	0.0531929	COL2A1, MYO15A, EPHB2, SOBP, FGFR1	464	33	10659	3.4806	1	1	1
GOTERM_BP_DIRECT	GO:1990138	neuron projection extension	3	0.374532	0.0553566	NRN1, FLRT1, PLXNA3	464	9	10659	7.65733	1	1	1
GOTERM_BP_DIRECT	GO:0043616	keratinocyte proliferation	3	0.374532	0.0553566	PTCH1, WNT16, FGF10	464	9	10659	7.65733	1	1	1
GOTERM_BP_DIRECT	GO:0044458	motile cilium assembly	3	0.374532	0.0553566	DNAAF1, AKAP4, CCDC40	464	9	10659	7.65733	1	1	1
GOTERM_BP_DIRECT	GO:0003351	epithelial cilium movement	3	0.374532	0.0553566	ADCY10, DNAH1, NME5	464	9	10659	7.65733	1	1	1
GOTERM_BP_DIRECT	GO:0070374	positive regulation of ERK1 and ERK2 cascade	9	1.1236	0.0597361	PDGFRA, ANGPT1, BMPER, SRC, FGF19, ACKR3, ARRB2, FGF10, HCRTR1	464	97	10659	2.13142	1	1	1
GOTERM_BP_DIRECT	GO:0007050	cell cycle arrest	6	0.749064	0.0603081	SOX2, TGFB2, SMAD3, IFNG, INHBA, PKD2	464	49	10659	2.8129	1	1	1
GOTERM_BP_DIRECT	GO:0010718	positive regulation of epithelial to mesenchymal transition	4	0.499376	0.0605985	TGFB2, DAB2, SMAD3, TGFB3	464	21	10659	4.37562	1	1	1
GOTERM_BP_DIRECT	GO:0001958	endochondral ossification	4	0.499376	0.0605985	MMP14, COL2A1, INPPL1, ALPL	464	21	10659	4.37562	1	1	1
GOTERM_BP_DIRECT	GO:0001974	blood vessel remodeling	4	0.499376	0.0605985	TGFB2, HOXA3, ACVR2B, FGF10	464	21	10659	4.37562	1	1	1
GOTERM_BP_DIRECT	GO:0030198	extracellular matrix organization	7	0.873908	0.0622938	PDGFRA, EGFLAM, COL27A1, EGFL6, LOC105603423, NDNF, NR2E1	464	65	10659	2.47391	1	1	1
GOTERM_BP_DIRECT	GO:0006355	regulation of transcription, DNA-templated	21	2.62172	0.0633361	USP13, ZNF484, ZNF19, EYA1, SFMBT2, ZNF34, MEIS3, SOX2, ZNF404, HOXA1, ZNF568, MKX, ZNF169, ZFP37, ZNF862, ZNF311, LOC101119043, ZNF684, LHX8, ZNF772, HOXA4	464	319	10659	1.51226	1	1	1
GOTERM_BP_DIRECT	GO:0006357	regulation of transcription from RNA polymerase II promoter	7	0.873908	0.0661386	RAI1, TCF7L1, RFX2, GLIS3, INHBA, LPIN1, PKNOX2	464	66	10659	2.43642	1	1	1
GOTERM_BP_DIRECT	GO:0048546	digestive tract morphogenesis	3	0.374532	0.067252	SFRP2, AGR2, SOX10	464	10	10659	6.89159	1	1	1
GOTERM_BP_DIRECT	GO:0036159	inner dynein arm assembly	3	0.374532	0.067252	DNAH1, DNAAF1, CCDC40	464	10	10659	6.89159	1	1	1
GOTERM_BP_DIRECT	GO:2001240	negative regulation of extrinsic apoptotic signaling pathway in absence of ligand	4	0.499376	0.067989	COL2A1, MAPK7, EYA1, FGF10	464	22	10659	4.17672	1	1	1
GOTERM_BP_DIRECT	GO:0043410	positive regulation of MAPK cascade	5	0.62422	0.0692772	SOX2, IGFBP4, LPAR1, IGF2, FGF10	464	36	10659	3.19055	1	1	1
GOTERM_BP_DIRECT	GO:0007186	G-protein coupled receptor signaling pathway	6	0.749064	0.069334	CCL25, GNAQ, RGS7BP, VAV1, BAIAP3, GNAI2	464	51	10659	2.70259	1	1	1
GOTERM_BP_DIRECT	GO:0009952	anterior/posterior pattern specification	7	0.873908	0.0742349	PCGF2, HOXA3, HOXA2, TULP3, ACVR2B, GLI3, GLI2	464	68	10659	2.36476	1	1	1
GOTERM_BP_DIRECT	GO:0009611	response to wounding	4	0.499376	0.0757671	SOX2, TGFB2, MDK, GLI1	464	23	10659	3.99513	1	1	1
GOTERM_BP_DIRECT	GO:0045787	positive regulation of cell cycle	4	0.499376	0.0757671	TGFB2, NR2E1, TRIM32, FGFR1	464	23	10659	3.99513	1	1	1
GOTERM_BP_DIRECT	GO:0051897	positive regulation of protein kinase B signaling	6	0.749064	0.0790638	ANGPT1, SRC, IGF2, TNFSF11, ARRB2, MEIS3	464	53	10659	2.6006	1	1	1
GOTERM_BP_DIRECT	GO:0048557	embryonic digestive tract morphogenesis	3	0.374532	0.079897	PDGFRA, GLI3, FGF10	464	11	10659	6.26509	1	1	1
GOTERM_BP_DIRECT	GO:0021522	spinal cord motor neuron differentiation	3	0.374532	0.079897	DYNC2H1, PTCH1, IFT172	464	11	10659	6.26509	1	1	1
GOTERM_BP_DIRECT	GO:0045879	negative regulation of smoothened signaling pathway	3	0.374532	0.079897	HHIP, PTCH1, GLI3	464	11	10659	6.26509	1	1	1
GOTERM_BP_DIRECT	GO:0034614	cellular response to reactive oxygen species	3	0.374532	0.079897	PDGFRA, SRC, PPARGC1B	464	11	10659	6.26509	1	1	1
GOTERM_BP_DIRECT	GO:0032332	positive regulation of chondrocyte differentiation	3	0.374532	0.079897	SMAD3, SOX6, GLI3	464	11	10659	6.26509	1	1	1
GOTERM_BP_DIRECT	GO:0000187	activation of MAPK activity	5	0.62422	0.0812335	CD81, HGF, LPAR1, MAP2K6, FGF10	464	38	10659	3.02263	1	1	1
GOTERM_BP_DIRECT	GO:0035987	endodermal cell differentiation	4	0.499376	0.0839175	MMP14, COL7A1, COL6A1, INHBA	464	24	10659	3.82866	1	1	1
GOTERM_BP_DIRECT	GO:0016485	protein processing	4	0.499376	0.0839175	DYNC2H1, PTCH1, IFT172, GLI3	464	24	10659	3.82866	1	1	1
GOTERM_BP_DIRECT	GO:0010811	positive regulation of cell-substrate adhesion	4	0.499376	0.0839175	EGFLAM, EGFL6, AGR2, NDNF	464	24	10659	3.82866	1	1	1
GOTERM_BP_DIRECT	GO:0060032	notochord regression	2	0.249688	0.084992	GLI1, GLI2	464	2	10659	22.972	1	1	1
GOTERM_BP_DIRECT	GO:0021681	cerebellar granular layer development	2	0.249688	0.084992	MDK, FAIM2	464	2	10659	22.972	1	1	1
GOTERM_BP_DIRECT	GO:0061005	cell differentiation involved in kidney development	2	0.249688	0.084992	PTCH1, GLI3	464	2	10659	22.972	1	1	1
GOTERM_BP_DIRECT	GO:0045163	clustering of voltage-gated potassium channels	2	0.249688	0.084992	KCNIP2, CNTN2	464	2	10659	22.972	1	1	1
GOTERM_BP_DIRECT	GO:0001866	NK T cell proliferation	2	0.249688	0.084992	IL15, ELF4	464	2	10659	22.972	1	1	1
GOTERM_BP_DIRECT	GO:0045893	positive regulation of transcription, DNA-templated	14	1.74782	0.0850991	ZFHX3, PRMT2, CITED1, MYRF, TGFB3, PTCH1, INHBA, GLI1, RAI1, DAB2, IL5, MDK, FAM170A, PLCB1	464	196	10659	1.64086	1	1	1
GOTERM_BP_DIRECT	GO:0002062	chondrocyte differentiation	4	0.499376	0.0924242	COL2A1, PTH1R, FGFR1, GLI2	464	25	10659	3.67552	1	1	1
GOTERM_BP_DIRECT	GO:0045669	positive regulation of osteoblast differentiation	5	0.62422	0.0941356	SFRP2, TMEM119, ACVR2B, GLI3, CTHRC1	464	40	10659	2.8715	1	1	1

## Sheet: cluster 6
Category	Term		Count	%	PValue	Genes	List Total	Pop Hits	Pop Total	Fold Enrichment	Bonferroni	Benjamini	FDR
GOTERM_BP_DIRECT	GO:0010811	positive regulation of cell-substrate adhesion	5	1.84502	0.000461942	CCDC80, ECM2, SPOCK2, COL8A1, EDIL3	166	24	10659	13.3773	0.295476	0.350152	0.350152
GOTERM_BP_DIRECT	GO:0030198	extracellular matrix organization	6	2.21402	0.0032692	CCDC80, ECM2, ADAMTSL4, SPOCK2, ITGA8, OLFML2A	166	65	10659	5.92715	0.916433	0.747903	0.747903
GOTERM_BP_DIRECT	GO:0032956	regulation of actin cytoskeleton organization	4	1.47601	0.00342144	ARHGEF19, DIXDC1, HRG, EPHA3	166	20	10659	12.8422	0.92557	0.747903	0.747903
GOTERM_BP_DIRECT	GO:0030168	platelet activation	4	1.47601	0.00394672	FGB, AXL, P2RX1, HRG	166	21	10659	12.2306	0.95009	0.747903	0.747903
GOTERM_BP_DIRECT	GO:0010468	regulation of gene expression	5	1.84502	0.00786219	SCARA5, FAM46A, HRG, PTHLH, UMODL1	166	51	10659	6.29518	0.997479	1	1
GOTERM_BP_DIRECT	GO:0070208	protein heterotrimerization	3	1.10701	0.00798353	COL1A1, COL1A2, C1QTNF6	166	9	10659	21.4036	0.997702	1	1
GOTERM_BP_DIRECT	GO:0030193	regulation of blood coagulation	3	1.10701	0.0141976	SCARA5, FAM46A, HRG	166	12	10659	16.0527	0.99998	1	1
GOTERM_BP_DIRECT	GO:0016525	negative regulation of angiogenesis	4	1.47601	0.0236798	SERPINF1, TIE1, FOXO4, HRG	166	40	10659	6.42108	1	1	1
GOTERM_BP_DIRECT	GO:0006885	regulation of pH	3	1.10701	0.0247914	SLC9A3, SLC9A7, PDK2	166	16	10659	12.0395	1	1	1
GOTERM_BP_DIRECT	GO:0043524	negative regulation of neuron apoptotic process	5	1.84502	0.0287949	TFAP2B, DRAXIN, FOXB1, GABRA5, AXL	166	75	10659	4.28072	1	1	1
GOTERM_BP_DIRECT	GO:0048863	stem cell differentiation	3	1.10701	0.0526258	LIF, FOXO4, ETV4	166	24	10659	8.02636	1	1	1
GOTERM_BP_DIRECT	GO:0007165	signal transduction	7	2.58303	0.0584839	FGB, RASSF4, SPOCK2, SMOC1, SPARCL1, CD34, PDE9A	166	178	10659	2.52515	1	1	1
GOTERM_BP_DIRECT	GO:0030195	negative regulation of blood coagulation	2	0.738007	0.0605048	CD34, KNG1	166	4	10659	32.1054	1	1	1
GOTERM_BP_DIRECT	GO:0043588	skin development	3	1.10701	0.0607467	TFAP2B, FRAS1, PTCH2	166	26	10659	7.40894	1	1	1
GOTERM_BP_DIRECT	GO:0001568	blood vessel development	3	1.10701	0.0649576	COL1A1, COL1A2, TIE1	166	27	10659	7.13454	1	1	1
GOTERM_BP_DIRECT	GO:0030199	collagen fibril organization	3	1.10701	0.0649576	COL1A1, COL1A2, LOX	166	27	10659	7.13454	1	1	1
GOTERM_BP_DIRECT	GO:0008203	cholesterol metabolic process	3	1.10701	0.0692633	LIPC, PON1, APOA2	166	28	10659	6.87973	1	1	1
GOTERM_BP_DIRECT	GO:1901016	regulation of potassium ion transmembrane transporter activity	2	0.738007	0.0750536	CACNA1D, KCNAB1	166	5	10659	25.6843	1	1	1
GOTERM_BP_DIRECT	GO:2000096	positive regulation of Wnt signaling pathway, planar cell polarity pathway	2	0.738007	0.0750536	MLLT3, ANKRD6	166	5	10659	25.6843	1	1	1
GOTERM_BP_DIRECT	GO:0030212	hyaluronan metabolic process	2	0.738007	0.0750536	ITIH5, ITIH2	166	5	10659	25.6843	1	1	1
GOTERM_BP_DIRECT	GO:0007411	axon guidance	4	1.47601	0.0852332	LGI1, DRAXIN, SEMA6A, LAMB2	166	67	10659	3.83348	1	1	1
GOTERM_BP_DIRECT	GO:0043589	skin morphogenesis	2	0.738007	0.0893783	COL1A1, COL1A2	166	6	10659	21.4036	1	1	1
GOTERM_BP_DIRECT	GO:0060762	regulation of branching involved in mammary gland duct morphogenesis	2	0.738007	0.0893783	WNT5A, ETV4	166	6	10659	21.4036	1	1	1
GOTERM_BP_DIRECT	GO:0010960	magnesium ion homeostasis	2	0.738007	0.0893783	TFAP2B, CNNM2	166	6	10659	21.4036	1	1	1

## Sheet: cluster 7
Category	Term		Count	%	PValue	Genes	List Total	Pop Hits	Pop Total	Fold Enrichment	Bonferroni	Benjamini	FDR
GOTERM_BP_DIRECT	GO:0006936	muscle contraction	11	2.08333	1.11667e-10	TMOD1, CHRNB1, MYOM1, MYBPC1, MYBPC2, ACTN3, ACTN2, MYL1, LOC443471, CLCN1, MYOM2	335	20	10659	17.4999	1.41036e-07	1.41036e-07	1.39919e-07
GOTERM_BP_DIRECT	GO:0045214	sarcomere organization	7	1.32576	5.5566e-06	ACTN2, CASQ2, CAPN3, TCAP, CASQ1, MYPN, KLHL41	335	16	10659	13.9203	0.00699344	0.00350899	0.00348121
GOTERM_BP_DIRECT	GO:0003009	skeletal muscle contraction	6	1.13636	1.15963e-05	CHRNA1, TNNT3, TNNC2, STAC3, TNNI2, TCAP	335	11	10659	17.3552	0.0145395	0.00488206	0.00484341
GOTERM_BP_DIRECT	GO:0051607	defense response to virus	12	2.27273	2.88591e-05	LOC101103623, BST-2A, CXCL10, RNASEL, CXCL9, SLFN11, RSAD2, MX2, IRF1, LOC101119159, TLR7, ADAR	335	78	10659	4.89506	0.0357933	0.00911227	0.00904012
GOTERM_BP_DIRECT	GO:0006956	complement activation	5	0.94697	5.99949e-05	C5, C1S, LOC101107430, C8A, CFB	335	8	10659	19.8862	0.072976	0.0151547	0.0150347
GOTERM_BP_DIRECT	GO:0045071	negative regulation of viral genome replication	6	1.13636	0.000237252	RNASEL, RSAD2, MX1, EIF2AK2, ADAR, LOC101102194	335	19	10659	10.0478	0.258949	0.0499416	0.0495462
GOTERM_BP_DIRECT	GO:0045087	innate immune response	11	2.08333	0.000450683	IFIH1, FGA, DDX58, MX2, MX1, LOC101119159, TRIM25, EIF2AK2, LBP, PML, S100A8	335	89	10659	3.93255	0.434102	0.0813161	0.0806722
GOTERM_BP_DIRECT	GO:0009615	response to virus	8	1.51515	0.000520432	TBX21, MX1, DHX58, ODC1, EIF2AK2, APOB, LOC101102194, IFIT3	335	46	10659	5.53355	0.481843	0.0821633	0.0815127
GOTERM_BP_DIRECT	GO:0051694	pointed-end actin filament capping	4	0.757576	0.000971661	TMOD1, TMOD4, LMOD3, LMOD2	335	7	10659	18.1817	0.707065	0.136356	0.135277
GOTERM_BP_DIRECT	GO:0048741	skeletal muscle fiber development	5	0.94697	0.00127815	MYOG, ACTA1, STAC3, KLHL40, KLHL41	335	16	10659	9.9431	0.801177	0.161431	0.160153
GOTERM_BP_DIRECT	GO:0014850	response to muscle activity	4	0.757576	0.00151866	PRKAA2, CAPN3, PPARGC1A, TNS2	335	8	10659	15.909	0.853324	0.17437	0.172989
GOTERM_BP_DIRECT	GO:0051281	positive regulation of release of sequestered calcium ion into cytosol	5	0.94697	0.00204513	CXCL10, CXCL9, CAPN3, DRD1, F2	335	18	10659	8.83831	0.924652	0.200756	0.199167
GOTERM_BP_DIRECT	GO:0042730	fibrinolysis	4	0.757576	0.00222533	FGA, CPB2, PLG, F2	335	9	10659	14.1413	0.940019	0.200756	0.199167
GOTERM_BP_DIRECT	GO:0019433	triglyceride catabolic process	4	0.757576	0.00222533	LIPE, LPL, APOC3, APOB	335	9	10659	14.1413	0.940019	0.200756	0.199167
GOTERM_BP_DIRECT	GO:0035995	detection of muscle stretch	3	0.568182	0.00287611	CSRP3, CAV3, TCAP	335	3	10659	31.8179	0.973689	0.242168	0.240251
GOTERM_BP_DIRECT	GO:0045662	negative regulation of myoblast differentiation	5	0.94697	0.00371436	CXCL10, MSTN, NMRK2, SOX8, TBX3	335	21	10659	7.57569	0.990904	0.285318	0.283059
GOTERM_BP_DIRECT	GO:0006955	immune response	13	2.46212	0.00384038	CD274, CXCL9, LOC101115115, LOC100101238, C8B, C8A, CXCL10, C6, C7, C9, CCR9, TLR7, CCL16	335	157	10659	2.6346	0.992248	0.285318	0.283059
GOTERM_BP_DIRECT	GO:0032728	positive regulation of interferon-beta production	4	0.757576	0.00690258	IFIH1, DDX58, IRF1, IRF7	335	13	10659	9.79013	0.999841	0.484331	0.480496
GOTERM_BP_DIRECT	GO:0007274	neuromuscular synaptic transmission	4	0.757576	0.00858362	CHRNA1, CHRNB1, MYLK2, STAC3	335	14	10659	9.09083	0.999981	0.55298	0.548602
GOTERM_BP_DIRECT	GO:0006941	striated muscle contraction	3	0.568182	0.00919445	MYLK2, PGAM2, NOS1	335	5	10659	19.0907	0.999991	0.55298	0.548602
GOTERM_BP_DIRECT	GO:0035455	response to interferon-alpha	3	0.568182	0.00919445	MX2, EIF2AK2, ADAR	335	5	10659	19.0907	0.999991	0.55298	0.548602
GOTERM_BP_DIRECT	GO:0046716	muscle cell cellular homeostasis	4	0.757576	0.0104839	CHRNA1, CAV3, MSTN, PLG	335	15	10659	8.48478	0.999998	0.601869	0.597103
GOTERM_BP_DIRECT	GO:0055117	regulation of cardiac muscle contraction	3	0.568182	0.0185218	EHD3, CAV3, ADRA1A	335	7	10659	13.6362	1	0.866408	0.859548
GOTERM_BP_DIRECT	GO:0009142	nucleoside triphosphate biosynthetic process	3	0.568182	0.0185218	AK1, CMPK2, AK5	335	7	10659	13.6362	1	0.866408	0.859548
GOTERM_BP_DIRECT	GO:0055008	cardiac muscle tissue morphogenesis	3	0.568182	0.0185218	MYLK2, XIRP2, TCAP	335	7	10659	13.6362	1	0.866408	0.859548
GOTERM_BP_DIRECT	GO:0001778	plasma membrane repair	3	0.568182	0.0185218	CAV3, DYSF, LOC443471	335	7	10659	13.6362	1	0.866408	0.859548
GOTERM_BP_DIRECT	GO:0051258	protein polymerization	3	0.568182	0.0185218	FGA, CASQ2, CASQ1	335	7	10659	13.6362	1	0.866408	0.859548
GOTERM_BP_DIRECT	GO:0002026	regulation of the force of heart contraction	3	0.568182	0.0241895	MYL4, CSRP3, ATP1A2	335	8	10659	11.9317	1	1	0.992868
GOTERM_BP_DIRECT	GO:0032727	positive regulation of interferon-alpha production	3	0.568182	0.0241895	IFIH1, DDX58, IRF7	335	8	10659	11.9317	1	1	0.992868
GOTERM_BP_DIRECT	GO:0007156	homophilic cell adhesion via plasma membrane adhesion molecules	7	1.32576	0.0315977	CDH5, CDH4, CLSTN2, CDHR4, CDH15, CDH16, PCDH19	335	76	10659	2.9306	1	1	0.992868
GOTERM_BP_DIRECT	GO:0043066	negative regulation of apoptotic process	13	2.46212	0.0319737	ANGPT4, PRKAA2, EIF2AK2, ADAR, IFIT3, TBX3, ADAMTS20, PLAC8, ERBB4, ALB, CAPN3, SOX8, LIMS2	335	209	10659	1.9791	1	1	0.992868
GOTERM_BP_DIRECT	GO:0060048	cardiac muscle contraction	4	0.757576	0.0339516	MYL4, CSRP3, CASQ2, TCAP	335	23	10659	5.53355	1	1	0.992868
GOTERM_BP_DIRECT	GO:0016525	negative regulation of angiogenesis	5	0.94697	0.035685	ANGPT4, STAT1, APOH, PDE3B, PML	335	40	10659	3.97724	1	1	0.992868
GOTERM_BP_DIRECT	GO:0005978	glycogen biosynthetic process	3	0.568182	0.0373048	PHKG1, AGL, PRKAG3	335	10	10659	9.54537	1	1	0.992868
GOTERM_BP_DIRECT	GO:0001975	response to amphetamine	3	0.568182	0.0373048	PPP1R1B, DRD1, DRD3	335	10	10659	9.54537	1	1	0.992868
GOTERM_BP_DIRECT	GO:0035914	skeletal muscle cell differentiation	5	0.94697	0.0416507	MYF6, SMYD1, SOX8, KLHL41, MYF5	335	42	10659	3.78785	1	1	0.992868
GOTERM_BP_DIRECT	GO:0002027	regulation of heart rate	3	0.568182	0.0446677	CAV3, CASQ2, SNTA1	335	11	10659	8.67761	1	1	0.992868
GOTERM_BP_DIRECT	GO:0032722	positive regulation of chemokine production	3	0.568182	0.0525143	EIF2AK2, TLR7, LBP	335	12	10659	7.95448	1	1	0.992868
GOTERM_BP_DIRECT	GO:0043488	regulation of mRNA stability	3	0.568182	0.0525143	RNASEL, CALCR, RBM24	335	12	10659	7.95448	1	1	0.992868
GOTERM_BP_DIRECT	GO:0042632	cholesterol homeostasis	5	0.94697	0.0588766	NR5A2, CAV3, LPL, APOC3, APOB	335	47	10659	3.38488	1	1	0.992868
GOTERM_BP_DIRECT	GO:1902187	negative regulation of viral release from host cell	3	0.568182	0.0608073	TRIM25, TRIM21, PML	335	13	10659	7.34259	1	1	0.992868
GOTERM_BP_DIRECT	GO:0060307	regulation of ventricular cardiac muscle cell membrane repolarization	3	0.568182	0.0608073	CAV3, KCNE5, SNTA1	335	13	10659	7.34259	1	1	0.992868
GOTERM_BP_DIRECT	GO:0030239	myofibril assembly	2	0.378788	0.061691	TMOD1, CAPN3	335	2	10659	31.8179	1	1	0.992868
GOTERM_BP_DIRECT	GO:0010897	negative regulation of triglyceride catabolic process	2	0.378788	0.061691	APOC3, PLIN5	335	2	10659	31.8179	1	1	0.992868
GOTERM_BP_DIRECT	GO:0034124	regulation of MyD88-dependent toll-like receptor signaling pathway	2	0.378788	0.061691	IRF1, IRF7	335	2	10659	31.8179	1	1	0.992868
GOTERM_BP_DIRECT	GO:0014819	regulation of skeletal muscle contraction	2	0.378788	0.061691	SLC8A3, CAV3	335	2	10659	31.8179	1	1	0.992868
GOTERM_BP_DIRECT	GO:0051659	maintenance of mitochondrion location	2	0.378788	0.061691	ALB, ATP2A1	335	2	10659	31.8179	1	1	0.992868
GOTERM_BP_DIRECT	GO:0014732	skeletal muscle atrophy	2	0.378788	0.061691	ACTN3, MSTN	335	2	10659	31.8179	1	1	0.992868
GOTERM_BP_DIRECT	GO:0031448	positive regulation of fast-twitch skeletal muscle fiber contraction	2	0.378788	0.061691	ACTN3, ATP2A1	335	2	10659	31.8179	1	1	0.992868
GOTERM_BP_DIRECT	GO:0051965	positive regulation of synapse assembly	5	0.94697	0.0666798	LINGO2, CLSTN2, SLITRK4, LRTM1, LRRN1	335	49	10659	3.24673	1	1	0.992868
GOTERM_BP_DIRECT	GO:0045663	positive regulation of myoblast differentiation	3	0.568182	0.0695113	MYOG, CXCL9, SMYD1	335	14	10659	6.81812	1	1	0.992868
GOTERM_BP_DIRECT	GO:0046034	ATP metabolic process	3	0.568182	0.0785924	AK1, ATP1A2, AK5	335	15	10659	6.36358	1	1	0.992868
GOTERM_BP_DIRECT	GO:0007166	cell surface receptor signaling pathway	6	1.13636	0.0858068	CD274, ADCYAP1R1, CALCR, LOC101115115, GCGR, F2	335	75	10659	2.54543	1	1	0.992868
GOTERM_BP_DIRECT	GO:2001014	regulation of skeletal muscle cell differentiation	2	0.378788	0.0910985	SIX1, KLHL41	335	3	10659	21.2119	1	1	0.992868
GOTERM_BP_DIRECT	GO:1902261	positive regulation of delayed rectifier potassium channel activity	2	0.378788	0.0910985	RNF207, AKAP6	335	3	10659	21.2119	1	1	0.992868
GOTERM_BP_DIRECT	GO:0048739	cardiac muscle fiber development	2	0.378788	0.0910985	MYO18B, TCAP	335	3	10659	21.2119	1	1	0.992868
GOTERM_BP_DIRECT	GO:0048630	skeletal muscle tissue growth	2	0.378788	0.0910985	CHRNA1, CHRND	335	3	10659	21.2119	1	1	0.992868
GOTERM_BP_DIRECT	GO:0045661	regulation of myoblast differentiation	2	0.378788	0.0910985	CAPN3, KLHL41	335	3	10659	21.2119	1	1	0.992868
GOTERM_BP_DIRECT	GO:0014816	skeletal muscle satellite cell differentiation	2	0.378788	0.0910985	MYLK2, MEGF10	335	3	10659	21.2119	1	1	0.992868
GOTERM_BP_DIRECT	GO:0060333	interferon-gamma-mediated signaling pathway	2	0.378788	0.0910985	STAT1, IRF1	335	3	10659	21.2119	1	1	0.992868
GOTERM_BP_DIRECT	GO:0048743	positive regulation of skeletal muscle fiber development	2	0.378788	0.0910985	MYOG, ACTN3	335	3	10659	21.2119	1	1	0.992868
GOTERM_BP_DIRECT	GO:0032757	positive regulation of interleukin-8 production	3	0.568182	0.0977598	DDX58, ADIPOQ, LBP	335	17	10659	5.61493	1	1	0.992868

## Sheet: cluster 8
Category	Term		Count	%	PValue	Genes	List Total	Pop Hits	Pop Total	Fold Enrichment	Bonferroni	Benjamini	FDR
GOTERM_BP_DIRECT	GO:0006955	immune response	7	8.75	5.3423e-05	CD40LG, DQA, WAS, LTB, LOC101117706, PF4	47	157	10659	10.1115	0.00877629	0.00881479	0.00881479
GOTERM_BP_DIRECT	GO:1900165	negative regulation of interleukin-6 secretion	2	2.5	0.0298292	BANK1, PTPN22	47	7	10659	64.7964	0.99324	1	1
GOTERM_BP_DIRECT	GO:0032753	positive regulation of interleukin-4 production	2	2.5	0.0587874	CD40LG, CD3E	47	14	10659	32.3982	0.999954	1	1
GOTERM_BP_DIRECT	GO:0007257	activation of JUN kinase activity	2	2.5	0.0709376	ERN2, CD40LG	47	17	10659	26.6809	0.999995	1	1
GOTERM_BP_DIRECT	GO:0002504	antigen processing and presentation of peptide or polysaccharide antigen via MHC class II	2	2.5	0.0749535	DQA	47	18	10659	25.1986	0.999997	1	1
GOTERM_BP_DIRECT	GO:0030168	platelet activation	2	2.5	0.0868994	CD40LG, PF4	47	21	10659	21.5988	1	1	1
GOTERM_BP_DIRECT	GO:0030217	T cell differentiation	2	2.5	0.0868994	RHOH, PTPN22	47	21	10659	21.5988	1	1	1
GOTERM_BP_DIRECT	GO:0051260	protein homooligomerization	3	3.75	0.0892168	SPTBN5, PRF1, VWA2	47	116	10659	5.86519	1	1	1
GOTERM_BP_DIRECT	GO:0006954	inflammatory response	3	3.75	0.0998551	CD40LG, LOC101117706, PF4	47	124	10659	5.48679	1	1	1

## Sheet: cluster 9
Category	Term		Count	%	PValue	Genes	List Total	Pop Hits	Pop Total	Fold Enrichment	Bonferroni	Benjamini	FDR
GOTERM_BP_DIRECT	GO:0015991	ATP hydrolysis coupled proton transport	10	0.892061	3.0602e-05	ATP4A, ATP6V0E1, ATP6AP1, ATP6V1B2, ATP6V0A2, ATP6V1H, ATP6V0A4, ATP6V0D2, ATP6V0A1, ATP6V1B1	721	26	10659	5.68601	0.0609803	0.0629178	0.0629178
GOTERM_BP_DIRECT	GO:0035878	nail development	4	0.356824	0.00116608	ITGB4, ITGA6, FOXN1, RSPO4	721	4	10659	14.7836	0.909179	0.60564	0.60564
GOTERM_BP_DIRECT	GO:0033157	regulation of intracellular protein transport	4	0.356824	0.00116608	PTPN1, SH3TC2, LCP1, NDEL1	721	4	10659	14.7836	0.909179	0.60564	0.60564
GOTERM_BP_DIRECT	GO:0006633	fatty acid biosynthetic process	7	0.624442	0.00117829	FA2H, CH25H, ACSM3, SCD, MSMO1, MLYCD, ACACA	721	19	10659	5.4466	0.911432	0.60564	0.60564
GOTERM_BP_DIRECT	GO:0009636	response to toxic substance	8	0.713649	0.00261984	LOC101119706, TTPA, SLC6A14, BLMH, ERCC6, TRPM6, SLC18A2, WAPL	721	29	10659	4.07824	0.995454	1	1
GOTERM_BP_DIRECT	GO:0009395	phospholipid catabolic process	5	0.44603	0.00464325	PLA2G4E, PLA2G4B, PLCG2, PLA2G4A, ABHD6	721	11	10659	6.71983	0.99993	1	1
GOTERM_BP_DIRECT	GO:0007156	homophilic cell adhesion via plasma membrane adhesion molecules	13	1.15968	0.00468681	RET, CLSTN3, PIK3CB, CELSR2, CDH1, CDHR2, DSG1, FAT2, DSG2, DSG4, PCDH1, DSC1, DSC3	721	76	10659	2.52878	0.999936	1	1
GOTERM_BP_DIRECT	GO:0035556	intracellular signal transduction	26	2.31936	0.00607031	ITK, RGS14, MAST1, ASB13, PRKAG2, RASAL1, ASB11, RPS6KA3, ZFP36, MKNK1, RPS6KA1, PLCG2, STK38L, PLEK2, ARHGEF12, BRAF, NET1, DEPDC7, SPSB1, TEC, STK17A, STK17B, PLEKHM1, SIK1, PLCD3, ARHGEF5	721	217	10659	1.77131	0.999996	1	1
GOTERM_BP_DIRECT	GO:0006914	autophagy	7	0.624442	0.0115783	NPC1, ITGB4, ATG2A, CHMP4B, NRBF2, WDR45, ATG7	721	29	10659	3.56846	1	1	1
GOTERM_BP_DIRECT	GO:0045766	positive regulation of angiogenesis	11	0.981267	0.0185334	LOC101119706, ECM1, SPHK1, ZC3H12A, SERPINE1, C5AR1, CHI3L1, PTK2B, EPHA1, F3, HIPK2	721	70	10659	2.32314	1	1	1
GOTERM_BP_DIRECT	GO:0019369	arachidonic acid metabolic process	4	0.356824	0.0189551	LOC101119706, DAGLB, ALOX15B, LOC101113251	721	9	10659	6.5705	1	1	1
GOTERM_BP_DIRECT	GO:0090611	ubiquitin-independent protein catabolic process via the multivesicular body sorting pathway	3	0.267618	0.0249472	VPS4B, CHMP4C, CHMP4B	721	4	10659	11.0877	1	1	1
GOTERM_BP_DIRECT	GO:0060213	positive regulation of nuclear-transcribed mRNA poly(A) tail shortening	4	0.356824	0.0257415	BTG2, ZFP36, PABPC1, TOB1	721	10	10659	5.91345	1	1	1
GOTERM_BP_DIRECT	GO:0042127	regulation of cell proliferation	10	0.892061	0.0271983	NFKBIA, FA2H, ERBB3, JUP, MAFG, MBD2, PLA2G4A, BRAF, PLCD3, TBX19	721	64	10659	2.30994	1	1	1
GOTERM_BP_DIRECT	GO:0043588	skin development	6	0.535236	0.0278678	JUP, ITGB4, DHCR24, ITGA6, ASPRV1, SLC27A4	721	26	10659	3.41161	1	1	1
GOTERM_BP_DIRECT	GO:0015693	magnesium ion transport	4	0.356824	0.0336533	NIPAL4, NIPAL1, NIPAL2, NIPAL3	721	11	10659	5.37587	1	1	1
GOTERM_BP_DIRECT	GO:0042574	retinal metabolic process	4	0.356824	0.0336533	LOC101119706, SDR16C5, LOC101119050, BCO1	721	11	10659	5.37587	1	1	1
GOTERM_BP_DIRECT	GO:0042632	cholesterol homeostasis	8	0.713649	0.0369708	ABCA1, DGAT2, FABP4, NPC1, EPHX2, LIPG, TMEM97, CD24	721	47	10659	2.51636	1	1	1
GOTERM_BP_DIRECT	GO:0097186	amelogenesis	3	0.267618	0.039733	ITGB4, PERP, ITGA6	721	5	10659	8.87018	1	1	1
GOTERM_BP_DIRECT	GO:0002070	epithelial cell maturation	3	0.267618	0.039733	KCNE1, GJA1, TMEM79	721	5	10659	8.87018	1	1	1
GOTERM_BP_DIRECT	GO:0006750	glutathione biosynthetic process	3	0.267618	0.039733	GGCT, GCLC, GCLM	721	5	10659	8.87018	1	1	1
GOTERM_BP_DIRECT	GO:0006954	inflammatory response	15	1.33809	0.0398922	GGT5, MAP2K3, ECM1, PXK, ANXA1, SPHK1, IL18, LOC101110922, MEFV, POLB, CRHBP, CHI3L1, TSPAN2, NLRP1, PTGDR	721	124	10659	1.78834	1	1	1
GOTERM_BP_DIRECT	GO:0061436	establishment of skin barrier	4	0.356824	0.0426721	CLDN4, TMEM79, LOC101110922, ABCA12	721	12	10659	4.92788	1	1	1
GOTERM_BP_DIRECT	GO:0008637	apoptotic mitochondrial changes	4	0.356824	0.0426721	GCLC, CD24, GCLM, MCL1	721	12	10659	4.92788	1	1	1
GOTERM_BP_DIRECT	GO:0006695	cholesterol biosynthetic process	4	0.356824	0.0527659	G6PD, DHCR24, HSD17B7, LSS	721	13	10659	4.54881	1	1	1
GOTERM_BP_DIRECT	GO:0061158	3'-UTR-mediated mRNA destabilization	3	0.267618	0.0569696	ZFP36, ZC3H12A, RC3H1	721	6	10659	7.39182	1	1	1
GOTERM_BP_DIRECT	GO:1900016	negative regulation of cytokine production involved in inflammatory response	3	0.267618	0.0569696	ZC3H12A, APOD, MEFV	721	6	10659	7.39182	1	1	1
GOTERM_BP_DIRECT	GO:0050727	regulation of inflammatory response	6	0.535236	0.0684652	IL1RL2, ANXA1, FABP4, BCL6, DUOXA1, TBC1D23	721	33	10659	2.68793	1	1	1
GOTERM_BP_DIRECT	GO:0045742	positive regulation of epidermal growth factor receptor signaling pathway	3	0.267618	0.0762595	PDE6G, SHKBP1, PLAUR	721	7	10659	6.33584	1	1	1
GOTERM_BP_DIRECT	GO:0008202	steroid metabolic process	3	0.267618	0.0762595	SULT2B1, LOC101119706, CYP17A1	721	7	10659	6.33584	1	1	1
GOTERM_BP_DIRECT	GO:0045745	positive regulation of G-protein coupled receptor protein signaling pathway	3	0.267618	0.0762595	PDE6G, KLK5, KLK6	721	7	10659	6.33584	1	1	1
GOTERM_BP_DIRECT	GO:0050880	regulation of blood vessel size	3	0.267618	0.0762595	GCLC, CBS, GCLM	721	7	10659	6.33584	1	1	1
GOTERM_BP_DIRECT	GO:0061014	positive regulation of mRNA catabolic process	3	0.267618	0.0762595	ZFP36, ZC3H12A, RC3H1	721	7	10659	6.33584	1	1	1
GOTERM_BP_DIRECT	GO:0090150	establishment of protein localization to membrane	3	0.267618	0.0762595	NPC1, BRAF, RAB11A	721	7	10659	6.33584	1	1	1
GOTERM_BP_DIRECT	GO:0047496	vesicle transport along microtubule	3	0.267618	0.0762595	NDE1, RASGRP1, NDEL1	721	7	10659	6.33584	1	1	1
GOTERM_BP_DIRECT	GO:0006672	ceramide metabolic process	3	0.267618	0.0762595	ORMDL2, ACER3, ORMDL1	721	7	10659	6.33584	1	1	1
GOTERM_BP_DIRECT	GO:0016042	lipid catabolic process	7	0.624442	0.0803918	PLA2G2F, LIPH, LIPM, PLCD3, PLA2G7, PNPLA1, PNPLA2	721	45	10659	2.29968	1	1	1
GOTERM_BP_DIRECT	GO:0035023	regulation of Rho protein signal transduction	9	0.802855	0.0808227	ITSN2, NET1, TIAM1, ARHGEF12, ALS2CL, ARHGEF37, RASGRF2, EPS8L1, ARHGEF5	721	67	10659	1.98586	1	1	1
GOTERM_BP_DIRECT	GO:0008544	epidermis development	4	0.356824	0.0890243	GRHL1, LOC101121728, LOC105613519, ZNF750	721	16	10659	3.69591	1	1	1
GOTERM_BP_DIRECT	GO:0018149	peptide cross-linking	4	0.356824	0.0890243	CSTA, ANXA1, TGM7, TGM3	721	16	10659	3.69591	1	1	1
GOTERM_BP_DIRECT	GO:0051260	protein homooligomerization	13	1.15968	0.0917519	KCNG4, KCNA2, ATL2, SLC1A1, KCTD1, IDE, KCTD4, KCTD5, ALAD, CLDN3, SHKBP1, LNX1, CHMP4B	721	116	10659	1.65679	1	1	1
GOTERM_BP_DIRECT	GO:0016477	cell migration	10	0.892061	0.0949752	TIAM1, CARMIL1, ZRANB1, JUP, TNN, CUL3, WWC1, PTK6, ELMO3, LCP1	721	81	10659	1.82514	1	1	1
GOTERM_BP_DIRECT	GO:0007264	small GTPase mediated signal transduction	20	1.78412	0.0957757	DOCK5, DOCK3, RASGRF2, DOCK8, RASEF, RAB11A, LOC101110847, RND1, MFHAS1, ARL4D, RAB20, RAB38, RHOV, CHML, RAPGEF5, RAB7B, RAB6A, RAPGEF4, ARL8B, ARF6	721	204	10659	1.44938	1	1	1
GOTERM_BP_DIRECT	GO:1902188	positive regulation of viral release from host cell	3	0.267618	0.0972474	VPS4B, CHMP4C, CHMP4B	721	8	10659	5.54386	1	1	1
GOTERM_BP_DIRECT	GO:0042176	regulation of protein catabolic process	3	0.267618	0.0972474	UBXN2A, FAF1, PSMD1	721	8	10659	5.54386	1	1	1
GOTERM_BP_DIRECT	GO:0045055	regulated exocytosis	3	0.267618	0.0972474	CRHBP, TMEM79, ABCA12	721	8	10659	5.54386	1	1	1
GOTERM_BP_DIRECT	GO:0016486	peptide hormone processing	3	0.267618	0.0972474	PCSK1, FURIN, PCSK6	721	8	10659	5.54386	1	1	1
GOTERM_BP_DIRECT	GO:0097284	hepatocyte apoptotic process	3	0.267618	0.0972474	MTCH2, KRT8, ARF6	721	8	10659	5.54386	1	1	1

## Sheet: cluster 10
Category	Term		Count	%	PValue	Genes	List Total	Pop Hits	Pop Total	Fold Enrichment	Bonferroni	Benjamini	FDR
GOTERM_BP_DIRECT	GO:0008152	metabolic process	14	2.01439	0.000144782	LOC443322, ACSS3, ECHS1, ACAA2, ECH1, LOC101107401, ACSL6, ACOD1, ACSM4, HDHD3, AADACL2, STS, ISOC1, ACSBG1	417	101	10659	3.54313	0.172775	0.189664	0.189664
GOTERM_BP_DIRECT	GO:0006635	fatty acid beta-oxidation	6	0.863309	0.00166092	HADHA, ABCD3, ACOX1, SESN2, CROT, DECR1	417	23	10659	6.66813	0.886688	0.988299	0.988299
GOTERM_BP_DIRECT	GO:0006955	immune response	15	2.15827	0.00331277	IL10, CCL22, LOC101108696, DYA, LOC101111617, ENDOU, CD4, DQA, CD28, TNFSF9, CTLA4, CCR8, CCR7, LOC101115073	417	157	10659	2.44215	0.987054	0.988299	0.988299
GOTERM_BP_DIRECT	GO:0051384	response to glucocorticoid	4	0.57554	0.00415819	IL10, IL1RN, GOT1, ACSBG1	417	9	10659	11.3605	0.99574	0.988299	0.988299
GOTERM_BP_DIRECT	GO:0006564	L-serine biosynthetic process	3	0.431655	0.00444094	PSAT1, PHGDH, PSPH	417	3	10659	25.5612	0.997064	0.988299	0.988299
GOTERM_BP_DIRECT	GO:0002504	antigen processing and presentation of peptide or polysaccharide antigen via MHC class II	5	0.719424	0.00452656	LOC101108696, DQA, DYA, LOC101115073	417	18	10659	7.10032	0.997377	0.988299	0.988299
GOTERM_BP_DIRECT	GO:0043651	linoleic acid metabolic process	3	0.431655	0.01405	PNPLA8, ALOX12, ALOXE3	417	5	10659	15.3367	1	1	1
GOTERM_BP_DIRECT	GO:0050715	positive regulation of cytokine secretion	4	0.57554	0.0155846	IL10, CRTAM, HTR2B, CLEC4E	417	14	10659	7.30319	1	1	1
GOTERM_BP_DIRECT	GO:0019372	lipoxygenase pathway	3	0.431655	0.0205345	PLA2G3, ALOX12, ALOXE3	417	6	10659	12.7806	1	1	1
GOTERM_BP_DIRECT	GO:0006954	inflammatory response	11	1.58273	0.0230762	P2RX7, IL10, LOC101105208, CCL22, NFKBIZ, CCR7, CXCR6, CD14, ACKR1, PTGS2, LOC101111617	417	124	10659	2.26752	1	1	1
GOTERM_BP_DIRECT	GO:0006914	autophagy	5	0.719424	0.0250903	GABARAPL2, MAP1LC3B, SESN2, TMEM74, ATG2B	417	29	10659	4.4071	1	1	1
GOTERM_BP_DIRECT	GO:0046513	ceramide biosynthetic process	4	0.57554	0.0311416	P2RX7, CERS5, SMPD1, ALOXE3	417	18	10659	5.68026	1	1	1
GOTERM_BP_DIRECT	GO:0007596	blood coagulation	5	0.719424	0.0312844	SERPINC1, F12, BLOC1S3, RAB27A, F5	417	31	10659	4.12277	1	1	1
GOTERM_BP_DIRECT	GO:0009267	cellular response to starvation	5	0.719424	0.0346888	SREBF1, PDK4, GAS2L1, GLUL, DSC2	417	32	10659	3.99393	1	1	1
GOTERM_BP_DIRECT	GO:0042104	positive regulation of activated T cell proliferation	4	0.57554	0.0359382	LOC101105208, GPAM, IL2RA, IL12RB1	417	19	10659	5.38129	1	1	1
GOTERM_BP_DIRECT	GO:0000038	very long-chain fatty acid metabolic process	3	0.431655	0.0363999	ACOX1, ACSBG1, LOC101103726	417	8	10659	9.58543	1	1	1
GOTERM_BP_DIRECT	GO:0050710	negative regulation of cytokine secretion	3	0.431655	0.0363999	FFAR4, LOC101103021, CIDEA	417	8	10659	9.58543	1	1	1
GOTERM_BP_DIRECT	GO:0019369	arachidonic acid metabolic process	3	0.431655	0.0456118	PNPLA8, ALOX12, ALOXE3	417	9	10659	8.52038	1	1	1
GOTERM_BP_DIRECT	GO:0008299	isoprenoid biosynthetic process	3	0.431655	0.0456118	HMGCS1, HMGCR, ISPD	417	9	10659	8.52038	1	1	1
GOTERM_BP_DIRECT	GO:0015937	coenzyme A biosynthetic process	3	0.431655	0.0456118	ACOT7, PANK1, COASY	417	9	10659	8.52038	1	1	1
GOTERM_BP_DIRECT	GO:0001935	endothelial cell proliferation	3	0.431655	0.0456118	ERN1, SCARB1, PRKX	417	9	10659	8.52038	1	1	1
GOTERM_BP_DIRECT	GO:0009749	response to glucose	4	0.57554	0.0465942	SREBF1, GPAM, SESN2, GLUL	417	21	10659	4.86879	1	1	1
GOTERM_BP_DIRECT	GO:0032729	positive regulation of interferon-gamma production	5	0.719424	0.0503748	LOC101105208, LOC101116896, SLAMF6, CD14, IL12RB1	417	36	10659	3.55016	1	1	1
GOTERM_BP_DIRECT	GO:0048872	homeostasis of number of cells	3	0.431655	0.0555724	CCR7, GCNT4, IL7R	417	10	10659	7.66835	1	1	1
GOTERM_BP_DIRECT	GO:0019835	cytolysis	3	0.431655	0.0555724	P2RX7, LOC443322, GZMM	417	10	10659	7.66835	1	1	1
GOTERM_BP_DIRECT	GO:0007017	microtubule-based process	4	0.57554	0.0651287	LOC101119713, LOC101122734, LOC101116286, TUBA4A	417	24	10659	4.26019	1	1	1
GOTERM_BP_DIRECT	GO:0030968	endoplasmic reticulum unfolded protein response	4	0.57554	0.0651287	STC2, DERL1, ATF3, HERPUD1	417	24	10659	4.26019	1	1	1
GOTERM_BP_DIRECT	GO:0050718	positive regulation of interleukin-1 beta secretion	3	0.431655	0.0662094	P2RX7, LOC101105208, NOD2	417	11	10659	6.97122	1	1	1
GOTERM_BP_DIRECT	GO:0042574	retinal metabolic process	3	0.431655	0.0662094	ALDH1A2, BCO2, ALDH8A1	417	11	10659	6.97122	1	1	1
GOTERM_BP_DIRECT	GO:0015936	coenzyme A metabolic process	2	0.28777	0.0765364	HMGCR, CROT	417	2	10659	25.5612	1	1	1
GOTERM_BP_DIRECT	GO:0010827	regulation of glucose transport	2	0.28777	0.0765364	FFAR4, TRIB3	417	2	10659	25.5612	1	1	1
GOTERM_BP_DIRECT	GO:0044062	regulation of excretion	2	0.28777	0.0765364	SLC9A3R1, NPHS1	417	2	10659	25.5612	1	1	1
GOTERM_BP_DIRECT	GO:2000660	negative regulation of interleukin-1-mediated signaling pathway	2	0.28777	0.0765364	IL1RN, IL1R2	417	2	10659	25.5612	1	1	1
GOTERM_BP_DIRECT	GO:2000382	positive regulation of mesoderm development	2	0.28777	0.0765364	ETV2, MIXL1	417	2	10659	25.5612	1	1	1
GOTERM_BP_DIRECT	GO:0031668	cellular response to extracellular stimulus	3	0.431655	0.0774552	P2RX7, FOSL1, FOS	417	12	10659	6.39029	1	1	1
GOTERM_BP_DIRECT	GO:0007616	long-term memory	3	0.431655	0.0774552	CTNS, SLC17A7, ADCY1	417	12	10659	6.39029	1	1	1
GOTERM_BP_DIRECT	GO:0006541	glutamine metabolic process	3	0.431655	0.0774552	GGH, PHGDH, CTPS1	417	12	10659	6.39029	1	1	1
GOTERM_BP_DIRECT	GO:0061436	establishment of skin barrier	3	0.431655	0.0774552	ALOX12, GRHL3, ALOXE3	417	12	10659	6.39029	1	1	1
GOTERM_BP_DIRECT	GO:0015991	ATP hydrolysis coupled proton transport	4	0.57554	0.0790797	ATP6V1A, ATP6V0B, ATP6V1E1, ATP6V1C1	417	26	10659	3.93248	1	1	1
GOTERM_BP_DIRECT	GO:0032868	response to insulin	4	0.57554	0.086502	HADHA, SORT1, TRPV4, SESN2	417	27	10659	3.78684	1	1	1
GOTERM_BP_DIRECT	GO:0045599	negative regulation of fat cell differentiation	4	0.57554	0.086502	SORT1, INSIG1, RORA, TRIB3	417	27	10659	3.78684	1	1	1
GOTERM_BP_DIRECT	GO:0006814	sodium ion transport	3	0.431655	0.0892463	SLC13A1, SLC13A2, SLC12A3	417	13	10659	5.89873	1	1	1
GOTERM_BP_DIRECT	GO:0006695	cholesterol biosynthetic process	3	0.431655	0.0892463	INSIG1, HMGCR, DHCR7	417	13	10659	5.89873	1	1	1
